# Supplementary material
Source: ML conference proceedings conference paper supplement (https://openreview.net/forum?id=GfZGdJHj27)
Supplement: supplementary_material [file attachment]

---

# Martingale Diffusion Models: Mitigating Sampling Drift by Learning to be Consistent

---

Anonymous Author(s)

Affiliation

Address

email

## Abstract

1 Imperfect score-matching leads to a shift between the training and the sampling  
2 distribution of diffusion models. Due to the recursive nature of the generation  
3 process, errors in previous steps yield sampling iterates that drift away from the  
4 training distribution. Yet, the standard training objective via Denoising Score  
5 Matching (DSM) is only designed to optimize over non-drifted data. To train  
6 on drifted data, we propose to enforce a *Martingale* property (MP) which states  
7 that predictions of the model on its own generated data follow a Martingale, thus  
8 being consistent with the outputs that it generates. Theoretically, we show that  
9 the differential equation that describes MP together with the one that describes  
10 conservative vector field, have a unique solution given some initial condition.  
11 Consequently, if the score is learned well on non-drifted points via DSM (enforcing  
12 the true initial condition) then enforcing MP on drifted points propagates true score  
13 values. Empirically we show that enforcing MP improves the generation quality for  
14 conditional and unconditional generation in CIFAR-10, and in AFHQ and FFHQ.

## 15 1 Introduction

16 The diffusion-based [45, 47, 17] approach to generative models has been successful across various  
17 modalities, including images [39, 42, 13, 37, 28, 49, 41, 15, 9, 10], videos [18, 19, 20], audio [31],  
18 3D structures [38], proteins [1, 51, 43, 8], and medical applications [22, 3].

19 Diffusion models generate data by first drawing a sample from a noisy distribution and slowly  
20 *denoising* this sample to ultimately obtain a sample from the target distribution. This is achieved by  
21 sampling, in reverse from time  $t = 1$  down to  $t = 0$ , a stochastic process  $\{x_t\}_{t \in [0,1]}$  wherein  $x_0$  is  
22 distributed according to the target distribution  $p_0$  and, for all  $t$ ,

$$x_t \sim p_t \text{ where } p_t := p_0 \oplus N(0, \sigma_t^2 I_d). \quad (1)$$

23 That is,  $p_t$  is the distribution resulting from corrupting a sample from  $p_0$  with noise sampled from  
24  $N(0, \sigma_t^2 I_d)$ , where  $\sigma_t$  is an increasing function such that  $\sigma_0 = 0$  and  $\sigma_1$  is sufficiently large so that  
25  $p_1$  is nearly indistinguishable from pure noise. We note that diffusion models have been generalized  
26 to other types of corruptions by the recent works of Daras et al. [11], Bansal et al. [4], Hoogeboom  
27 and Salimans [21], Deasy et al. [12], Nachmani et al. [36].

28 In order to sample from a diffusion model, i.e. sample the afore-described process in reverse time, it  
29 suffices to know the *score function*  $s(x, t) = \nabla_x \log p(x, t)$ , where  $p(x, t)$  is the density of  $x_t \sim p_t$ .  
30 Indeed, given a sample  $x_t \sim p_t$ , one can use the score function at  $x_t$ , i.e.  $s(x_t, t)$ , to generate a  
31 sample from  $p_{t-dt}$  by taking an infinitesimal step of a stochastic or an ordinary differential equation

[49, 46], or by using Langevin dynamics [16, 48].<sup>1</sup> Hence, in order to train a diffusion model to sample from a target distribution of interest  $p_0^*$  it suffices to learn the score function  $s^*(x, t)$  using samples from the corrupted distributions  $p_t^*$  resulting from  $p_0^*$  and a particular noise schedule  $\sigma_t$ . Notice that those samples can be easily drawn given samples from  $p_0^*$ .

**The Sampling Drift Challenge:** Unfortunately the true score function  $s^*(x, t)$  is not perfectly learned during training. Thus, at generation time, the samples  $x_t$  drawn using the learned score function,  $s(x, t)$ , in the ways discussed above, drift astray in distribution from the true corrupted distributions  $p_t^*$ . This drift becomes larger for smaller  $t$  due to compounding of errors and is accentuated by the fact that the further away a sample  $x_t$  is from the likely support of the true  $p_t^*$  the larger is also the error  $\|s(x_t, t) - s^*(x_t, t)\|$  between the learned and the true score function at  $x_t$ , which feeds into an even larger drift between the distribution of  $x_{t'}$  from  $p_{t'}^*$  for  $t' < t$ ; see e.g. [44, 17, 37, 5]. These challenges motivate the question:

*Question 1.* How can one train diffusion models to improve the error  $\|s(x, t) - s^*(x, t)\|$  between the learned and true score function on inputs  $(x, t)$  where  $x$  is unlikely under the target noisy distribution  $p_t^*$ ?

A direct approach to this challenge is to train our model to minimize the afore-described error on pairs  $(x, t)$  where  $x$  is sampled from distributions other than  $p_t^*$ . However, there is no straightforward way to do so, because we do not have direct access to the values of the true score function  $s^*(x, t)$ .

This motivates us to propose a training method to mitigate sampling drift by enforcing that the learned score function satisfies an invariant, that we call the Martingale Property (MP). This property relates multiple inputs to  $s(\cdot, \cdot)$  and can be optimized without using any samples from the target distribution  $p_0^*$ . We will show that theoretically, enforcing MP on drifted points, in conjunction with minimizing the standard score matching objective on non drifted points, suffices to learn the correct score everywhere - at least in the theoretical limit where the error approaches zero and when one also enforces conservative vector field. We also provide experiments illustrating that regularizing the standard score matching objective using our MP improves sample quality. Further, we provide an ablation study that further provides evidence to this phenomena of score propagation.

**Our Approach:** The true score function  $s^*(x, t)$  is closely related to another function, called *optimal denoiser*, which predicts a clean sample  $x_0 \sim p_0^*$  from a noisy observation  $x_t = x_0 + \sigma_t \eta$  where the noise is  $\eta \sim N(0, I_d)$ . The optimal denoiser (under the  $\ell_2$  loss) is the conditional expectation:

$$h^*(x, t) := \mathbb{E}[x_0 \mid x_t = x],$$

and the true score function can be obtained from the optimal denoiser as follows:  $s^*(x, t) = (h^*(x, t) - x)/\sigma_t^2$ . Indeed, the standard training technique, via *score-matching*, explicitly trains for the score through the denoiser  $h^*$  [52, 14, 34, 29, 33].

We are now ready to state our Martingale Property (MP). We will say that a (denoising) function  $h(x, t)$  satisfies MP iff

$$\forall t, \forall x : \mathbb{E}[x_0 \mid x_t = x] = h(x, t),$$

where the *expectation is with respect to a sample from the **learned** reverse process*, defined in terms of the implied score function  $s(x, t) = (h(x, t) - x)/\sigma_t^2$ , when this is initialized at  $x_t = x$  and run backwards in time to sample  $x_0$ . See Eq. (3) for the precise stochastic differential equation and its justification. In particular,  $h$  satisfies MP if the prediction  $h(x, t)$  of the conditional expectation of the clean image  $x_0$  given  $x_t = x$  equals the expected value of an image that is generated by the learned reversed process, starting from  $x_t = x$ . Equivalently, one can formulate this property as requiring  $x_t$  to follow an inverse Martingale (see Lemma 3.1).

While there are several other properties that the score function of a diffusion process must satisfy, e.g. the Fokker-Planck equation [32], our first theoretical result is that the  $h(x, t)$  satisfying the Martingale property suffices (in conjunction with the conservativeness of its score function  $s(x, t) = (h(x, t) - x)/\sigma_t^2$ ) to guarantee that  $s$  must be the score function of a diffusion process (and must thus satisfy any other property that a diffusion process must satisfy). If additionally  $s(x, t)$  equals the score function  $s^*(x, t)$  of a target diffusion process at a single time  $t = t_0$  and an open subset of

<sup>1</sup>Some of these methods, such as Langevin dynamics, require also to know the score function in the neighborhood of  $x_t$ .

81  $x \in \mathbb{R}^d$ , then it equals  $s^*$  everywhere. We comment that the formal theorem is proved for an idealistic  
 82 setting when the error is (or approaches) zero. Still, it is likely to believe that even in the finite-error  
 83 regime, training with DSM in-sample and enforcing MP off-sample is expected to improve the score  
 84 function values off-sample. The formal statement is summarized as follows below:

85 **Theorem 1.1** (informal). *If some denoiser  $h(x, t)$  satisfies MP and its corresponding score function  
 86  $s(x, t) = (h(x, t) - x)/\sigma_t^2$  is a conservative field, then  $s(x, t)$  is the score function of a diffusion  
 87 process, i.e. the generation process using score function  $s$ , is the inverse of a diffusion process. If  
 88 additionally  $s(x, t) = s^*(x, t)$  for a single  $t = t_0$  and for all  $x$  in an open subset of  $\mathbb{R}^d$ , where  $s^*$  is  
 89 the score function of a target diffusion process, then  $s(x, t) = s^*(x, t)$  everywhere.*

90 Simply put, the above statement states that: i) satisfying MP and being a conservative vector field is  
 91 enough to guarantee that the sampling process is the inverse of some diffusion process and ii) to learn  
 92 the score function everywhere it suffices to learn it for a single  $t_0$  and an open subset of  $x$ 's.

93 We propose a loss function to train for the Martingale Property and we show experimentally that  
 94 regularizing the standard score matching objective using our property leads to better models.

## 95 Summary of Contributions:

- 96 1. We identify an invariant property, the denoiser  $h$  being a Martingale, that any perfectly  
 97 trained model should satisfy.
- 98 2. We prove that if the denoiser  $h(x, t)$  satisfies MP and its implied score function  $s(x, t) =$   
 99  $(h(x, t) - x)/\sigma_t^2$  is a conservative field, then  $s(x, t)$  is the score function of *some* diffusion  
 100 process, even if there are learning errors with respect to the score of the target process, which  
 101 generates the training data.
- 102 3. We prove that optimizing for the score in a subset of the domain and enforcing these two  
 103 properties, guarantees that the score is learned correctly in all the domain, in the limit where  
 104 the error approaches zero.
- 105 4. We propose a novel training objective that enforces the Martingale Property. Our new  
 106 objective optimizes the network to have consistent predictions on data points from the  
 107 *learned* distribution.
- 108 5. We show experimentally that, paired with the original Denoising Score Matching (DSM)  
 109 loss, our objective improves generation quality on conditional and unconditional generation  
 110 in CIFAR10, and in AFHQ and FFHQ.
- 111 6. We conduct an ablation study which showcases that even if we do not optimize for DSM for  
 112 some values of  $t$ , satisfying MP enforces good score approximation there.

## 113 2 Background

114 **Diffusion processes, score functions and denoising.** Diffusion models are trained by solving a  
 115 supervised regression problem [47, 17]. The function that one aims to learn, called the score function,  
 116 defined below, is equivalent (up to a linear transformation) to a denoising function [14, 52], whose  
 117 goal is to denoise an image that was injected with noise. In particular, for some target distribution  $p_0$ ,  
 118 one's goal is to learn the following function  $h: \mathbb{R}^d \times [0, 1] \rightarrow \mathbb{R}^d$ :

$$119 \quad h(x, t) = \mathbb{E}[x_0 \mid x_t = x]; \quad x_0 \sim p_0, \quad x_t \sim N(x_0, \sigma_t^2 I_d). \quad (2)$$

120 In other words, the goal is to predict the expected "clean" image  $x_0$  given a corrupted version of  
 121 it, assuming that the image was sampled from  $p_0$  and its corruption was done by adding to it noise  
 122 from  $N(0, \sigma_t^2 I_d)$ , where  $\sigma_t^2$  is a non-negative and increasing function of  $t$ . Given such a function  $h$ ,  
 123 we can generate samples from  $p_0$  by solving a Stochastic Differential Equation (SDE) that depends  
 124 on  $h$  [49]. Specifically, one starts by sampling  $x_1$  from some fixed distribution and then runs the  
 following SDE backwards in time:

$$dx_t = -g(t)^2 \frac{h(x_t, t) - x_t}{\sigma_t^2} dt + g(t) d\bar{B}_t, \quad (3)$$

125 where  $\bar{B}_t$  is a reverse-time Brownian motion and  $g(t)^2 = \frac{d\sigma_t^2}{dt}$ . To explain how Eq. (3) was derived,  
 126 consider the *forward* SDE that starts with a clean image  $x_0$  and slowly injects noise:

$$dx_t = g(t) dB_t, \quad x_0 \sim p_0. \quad (4)$$

We notice here that the  $x_t$  under Eq. (4) is  $N(x_0, \sigma_t^2 I_d)$ , where  $x_0 \sim p_0$ , so it has the same distribution that it has in Eq. (2). Remarkably, such SDEs are reversible in time [2]. Hence, the diffusion process of Eq. (4) can be viewed as a reversed-time diffusion:

$$dx_t = -g(t)^2 \nabla_x \log p(x_t, t) dt + g(t) d\bar{B}_t, \quad (5)$$

where  $p(x_t, t)$  is the density of  $x_t$  at time  $t$ . We note that  $s(x, t) := \nabla_x \log p(x, t)$  is called the *score function* of  $x_t$  at time  $t$ . Using Tweedie’s lemma [14], one obtains the following relationship between the denoising function  $h$  and the score function:

$$\nabla_x \log p(x, t) = \frac{h(x, t) - x}{\sigma_t^2}. \quad (6)$$

Substituting Eq. (6) in Eq. (5), one obtains Eq. (3).

**Training via denoising score matching.** The standard way to train for  $h$  is via *denoising score matching*. This is performed by obtaining samples of  $x_0 \sim p_0$  and  $x_t \sim N(x_0, \sigma_t^2 I_d)$  and training to minimize

$$\mathbb{E}_{x_0 \sim p_0, x_t \sim N(x_0, \sigma_t^2 I_d)} L_{t, x_t, x_0}^1(\theta) = \mathbb{E}_{x_0 \sim p_0, x_t \sim N(x_0, \sigma_t^2 I_d)} \|h_\theta(x_t, t) - x_0\|^2,$$

where the optimization is over some family of functions,  $\{h_\theta\}_{\theta \in \Theta}$ . It was shown by Vincent [52] that optimizing Eq. (2) is equivalent to optimizing  $h$  in mean-squared-error on a random point  $x_t$  that is a noisy image,  $x_t \sim N(x_0, \sigma_t^2 I_d)$  where  $x_0 \sim p_0$ :

$$\mathbb{E}_{x_t} \|h_\theta(x_t, t) - h^*(x_t, t)\|^2,$$

where  $h^*$  is the true denoising function from Eq. (2).

### 3 Theory

We define below the Martingale Property that a function  $h$  should satisfy. Simply put, it states that the output of  $h(x, t)$  (which is meant to approximate the conditional expectation of  $x_0$  conditioned on  $x_t = x$ ) is consistent with the average point  $x_0$  generated using  $h$  and conditioning on  $x_t = x$ . Recall from the previous section that generation according to  $h$  conditioning on  $x_t = x$  is done by running the following SDE backwards in time conditioning on  $x_t = x$ :

$$dx_t = -g(t)^2 \frac{h(x_t, t) - x_t}{\sigma_t^2} dt + g(t)^2 d\bar{B}_t, \quad (7)$$

MP is therefore defined as follows:

**Property 1 (Martingale Property).** A function  $h: \mathbb{R}^d \times [0, 1] \rightarrow \mathbb{R}^d$  is said to satisfy *MP* iff for all  $t \in (0, 1]$  and all  $x \in \mathbb{R}^d$ ,

$$h(x, t) = \mathbb{E}_h[x_0 \mid x_t = x], \quad (8)$$

where  $\mathbb{E}_h[x_0 \mid x_t = x]$  corresponds to the conditional expectation of  $x_0$  in the process that starts with  $x_t = x$  and samples  $x_0$  by running the SDE of Eq. (7) backwards in time (where note that the SDE uses  $h$ ).

The following Lemma states that Property 1 holds if and only if the model prediction,  $h(x, t)$ ,  $h(x_t, t)$  is a reverse-Martingale under the same process of Eq. (7).

**Lemma 3.1.** *Property 1 holds if and only if the following two properties hold:*

- The function  $h$  is a reverse-Martingale, namely: for all  $t > t'$  and for any  $x$ :

$$h(x, t) = \mathbb{E}_h[h(x_{t'}, t') \mid x_t = x],$$

where the expectation is over  $x_{t'}$  that is sampled according to Eq. (7) with the same function  $h$ , given the initial condition  $x_t = x$ .

- For all  $x \in \mathbb{R}^d$ ,  $h(x, 0) = x$ .

The proof of this Lemma is included in Section B.2. Further, we introduce one more property that will be required for our theoretical results: the learned vector-field should be conservative.

162 **Property 2 (Conservative vector field / Score Property).** Let  $h: \mathbb{R}^d \times [0, 1] \rightarrow \mathbb{R}^d$ . We say that  $h$   
 163 induces a *conservative vector field* (or that it satisfies the score property) if for any  $t \in (0, 1]$  there  
 164 exists some probability density  $p(\cdot, t)$  such that

$$\frac{h(x, t) - x}{\sigma_t^2} = \nabla \log p(x, t).$$

165 We note that the optimal denoiser, i.e.  $h$  defined as in Eq. (2) satisfies both of the properties we  
 166 introduced. In the paper, we will focus on enforcing MP and we are going to assume conservativeness  
 167 for our theoretical results. This assumption can be relieved to hold only at a *single*  $t \in (0, 1]$  using  
 168 the results of Lai et al. [32].

169 Next, we show the theoretical consequences of enforcing Properties 1 and 2. First, we show that  
 170 this enforces  $h$  to indeed correspond to a denoising function, namely,  $h$  satisfies Eq. (2) for some  
 171 distribution  $p'_0$  over  $x_0$ . Yet, this does not imply that  $p_0$  is the *correct* underlying distribution that we  
 172 are trying to learn. Indeed, these properties can apply to any distribution  $p_0$ . Yet, we can show that  
 173 if we learn  $h$  correctly for some inputs and if these properties apply everywhere then  $h$  is learned  
 174 correctly everywhere.

175 **Theorem 3.2.** Let  $h: \mathbb{R}^d \times [0, 1] \rightarrow \mathbb{R}^d$  be a bounded continuous function. Then:

- 176 1. The function  $h$  satisfies both Properties 1 and 2 if and only if  $h$  is defined by Eq. (2) for some  
 177 distribution  $p_0$ .
- 178 2. Assume that  $h$  satisfies Properties 1 and 2. Further, let  $h^*$  be another function that cor-  
 179 responds to Eq. (2) with some initial distribution  $p_0^*$ . Assume that  $h = h^*$  on some open  
 180 set  $U \subseteq \mathbb{R}^d$  and some fixed  $t_0 \in (0, 1]$ , namely,  $h(x, t_0) = h^*(x, t_0)$  for all  $x \in U$ . Then,  
 181  $h^*(x, t) = h(x, t)$  for all  $x$  and all  $t$ .

182 **Remark 3.3.** While our theorem uses Eq. (2) which describes the VE-SDE, it is also valid for  
 183 VP-SDE, as these two SDEs are equivalent up to appropriate scaling (see e.g. [30, 27]).

## 184 4 Method

185 Theorem 3.2 motivates enforcing MP on the learned model. We notice that the MP Equation Eq. (8)  
 186 may be expensive to train for, because it requires one to generate whole trajectories. Rather, we use  
 187 the equivalent Martingale assumption of Lemma 3.1, which can be observed locally with only partial  
 188 trajectories:<sup>2</sup> We suggest the following loss function, for some fixed  $t, t'$  and  $x$ :

$$L_{t,t',x}^2(\theta) = (\mathbb{E}_\theta[h_\theta(x_{t'}, t') \mid x_t = x] - h_\theta(x, t))^2 / 2,$$

189 where the expectation  $\mathbb{E}_\theta[\cdot \mid x_t = x]$  is taken according to process Eq. (7) parameterized by  $h_\theta$  with  
 190 the initial condition  $x_t = x$ . Differentiating this expectation, one gets the following (see Section B.1  
 191 for full derivation):

$$\begin{aligned} \nabla L_{t,t',x}^2(\theta) = \mathbb{E}_\theta[h_\theta(x_{t'}, t') - h_\theta(x, t) \mid x_t = x]^\top \mathbb{E}_\theta \left[ h_\theta(x_{t'}, t') \nabla_\theta \log(p_\theta(x_{t'} \mid x_t = x)) + \right. \\ \left. \nabla_\theta h_\theta(x_{t'}, t') - \nabla_\theta h_\theta(x, t) \mid x_t = x \right], \end{aligned}$$

192 where  $p_\theta$  corresponds to the same probability measure where the expectation  $\mathbb{E}_\theta$  is taken from and  
 193  $\nabla_\theta h_\theta$  corresponds to the Jacobian matrix of  $h_\theta$  where the derivatives are taken with respect to  $\theta$ .  
 194 Notice, however, that computing the expectation accurately might require a large number of samples.  
 195 Instead, it is possible to obtain a stochastic gradient of this target by taking two samples,  $x_{t'}$  and  $x_{t'}$ ,  
 196 independently, from the conditional distribution of  $x_{t'}$  conditioned on  $x_t = x$  and replace each of the  
 197 two expectations in the formula above with one of these two samples.

198 We further notice the gradient of the MP loss can be written as

$$\begin{aligned} \nabla_\theta L_{t,t',x}^2(\theta) = \frac{1}{2} \nabla_\theta \|\mathbb{E}_\theta[h_\theta(x_{t'}, t')] - h_\theta(x, t)\|^2 + \\ \mathbb{E}_\theta[h_\theta(x_{t'}, t') - h_\theta(x, t)]^\top \mathbb{E}_\theta[\nabla_\theta \log(p(x_{t'})) h_\theta(x_{t'}, t')] \end{aligned}$$

<sup>2</sup>According to Lemma 3.1, in order to completely train for Property 1, one has to also enforce  $h(x, 0) = x$ , however, this is taken care from the denoising score matching objective Eq. (2).

In order to save on computation time, we trained by taking gradient steps with respect to only the first summand in this decomposition and notice that if MP is preserved then this term becomes zero, which implies that no update is made, as desired.

It remains to determine how to select  $t$ ,  $t'$  and  $x_{t'}$ . Notice that  $t$  has to vary throughout the whole range of  $[0, 1]$  whereas  $t'$  can either vary over  $[0, t]$ , however, it sufficient to take  $t' \in [t - \epsilon, t]$ . However, the further away  $t$  and  $t'$  are, we need to run more steps of the reverse SDE to avoid large discretization errors. Instead, we enforce the property only on small time windows using that consistency over small intervals implies global consistency. We notice that  $x_t$  can be chosen arbitrarily and two possible choices are to sample it from the target noisy distribution  $p_t$  or from the model.

*Remark 4.1.* It is important to sample  $x_{t'}$  conditioned on  $x_t$  according to the specific SDE Eq. (7). While a variety of alternative SDEs exist which preserve the same marginal distribution at any  $t$ , they might not preserve the conditionals.

## 5 Experiments

For all our experiments, we rely on the official open-sourced code and the training and evaluation hyper-parameters from the paper “*Elucidating the Design Space of Diffusion-Based Generative Models*” [27] that, to the best of our knowledge, holds the current state-of-the-art on conditional generation on CIFAR-10 and unconditional generation on CIFAR-10, AFHQ (64x64 resolution), FFHQ (64x64 resolution). We refer to the models trained with our regularization as “MDM (Ours)” and to models trained with vanilla Denoising Score Matching (DSM) as “EDM” models. “MDM” models are trained with the weighted objective:

$$L_{\lambda}^{\text{ours}}(\theta) = \mathbb{E}_t \left[ \mathbb{E}_{x_0 \sim p_0, x_t \sim \mathcal{N}(x_0, \sigma_t^2 I_d)} L_{t, x_t, x_0}^1(\theta) + \lambda \mathbb{E}_{x_t \sim p_t} \mathbb{E}_{t' \sim \mathcal{U}[t - \epsilon, t]} L_{t, t', x_t}^2(\theta) \right],$$

while the “EDM” models are trained only with the first term of the outer expectation. We also denote in the name whether the models have been trained with the Variance Preserving (VP) [49, 17] or the Variance Exploding [49, 48, 47], e.g. we write EDM-VP. Finally, for completeness, we also report scores from the models of Song et al. [49], following the practice of the EDM paper. We refer to the latter baselines as “NCSNv3” baselines.

We train diffusion models, with and without our regularization, for conditional generation on CIFAR-10 and unconditional generation on CIFAR-10 and AFHQ (64x64 resolution). For the re-trained models on CIFAR-10, we use exactly the same training hyperparameters as in Karras et al. [27] and we verify that our re-trained models match (within 1%) the FID numbers mentioned in the paper. For AFHQ, we dropped the batch size from the suggested value of 512 to 256 to save on computational resources, which increased the FID from 1.96 (reported value) to 2.29. All models were trained for 200k iterations, as in Karras et al. [27]. Finally, we retrain a baseline model on FFHQ for 150k iterations and we finetune it for 5k steps using our proposed objective.

**Implementation Choices and Computational Requirements.** As mentioned, when enforcing MP, we are free to choose  $t'$  anywhere in the interval  $[0, t]$ . When  $t, t'$  are far away, sampling  $x_{t'}$  from the distribution  $p_{t'}^{\theta}(x_{t'}|x_t)$  requires many sampling steps (to reduce discretization errors). Since this needs to be done for every Gradient Descent update, the training time increases significantly. Instead, we notice that local consistency implies global consistency. Hence, we first fix the number of sampling steps to run in every training iteration and then we sample  $t'$  uniformly in the interval  $[t - \epsilon, t]$  for some specified  $\epsilon$ . For all our experiments, we fix the number of sampling steps to 6 which roughly increases the training time needed by 1.5x. We train all our models on a DGX server with 8 A100 GPUs with 80GBs of memory each.

### 5.1 Martingale Property Testing

We are now ready to present our results. The first thing that we check is whether regularizing for MP actually leads to models that are more consistent with their predictions, as the property implies. Specifically, we want to check that the model trained with  $L_{\lambda}^{\text{ours}}$  achieves lower Martingale error, i.e. lower  $L_{t, t', x_t}^2$ . To check this, we do the following two tests: i) we fix  $t = 1$  and we show how  $L_{t, t', x_t}^2$  changes as  $t'$  changes in  $[0, 1]$ , ii) we fix  $t' = 0$  and we show how the loss is changing as you change  $t$  in  $[0, 1]$ . Intuitively, the first test shows how the violation of MP splits across the sampling process

248 and the second test shows how much you finally ( $t' = 0$ ) violate the property if the violation started  
 249 at time  $t$ . The results are shown in Figures 1a, 1b, respectively, for the models trained on AFHQ. We  
 250 include additional results for CIFAR-10, FFHQ in Figures 4, 5, 6, 7 of the Appendix. As shown,  
 251 indeed regularizing for the MP Loss drops the  $L^2_{t,t',x_t}$  as expected.

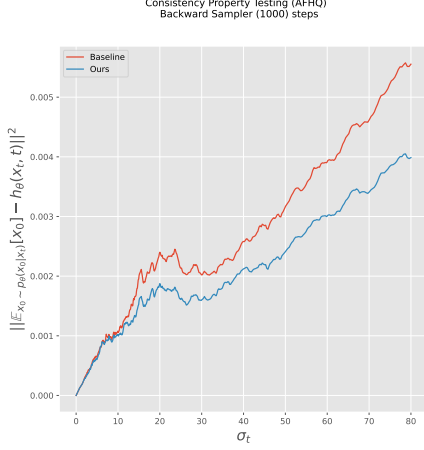

(a) Martingale Property Testing on AFHQ. The plot illustrates how the Martingale Loss,  $L^2_{t,t',x_t}$ , behaves for  $t' = 0$ , as  $t$  changes.

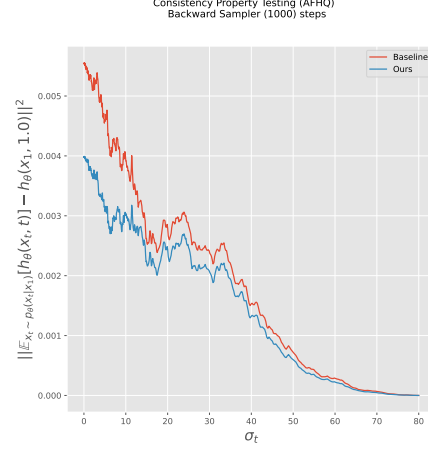

(b) Martingale Property Testing on AFHQ. The plot illustrates how the Martingale Loss,  $L^2_{t,t',x_t}$ , behaves for  $t = 0$ , as  $t'$  changes.

Figure 1: Martingale Property Testing on AFHQ.

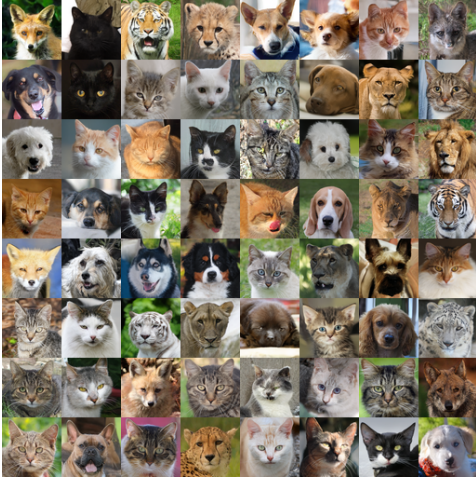

(a) Uncensored images by our model trained on AFHQ. FID: 2.21, NFEs: 79.

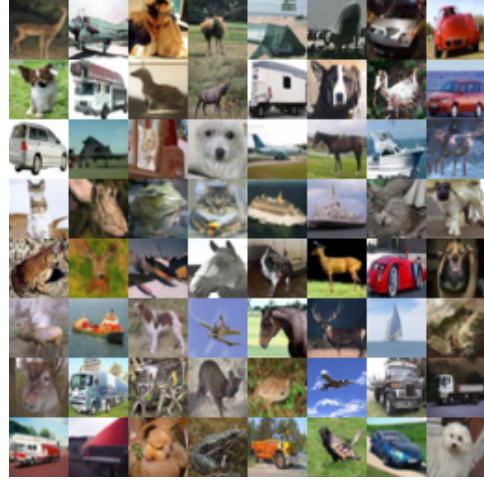

(b) Uncensored images by our conditional CIFAR-10 model. FID: 1.77, NFEs: 35.

Figure 2: Comparison of uncensored images generated by two different models.

252 **Performance.** We evaluate performance of the models trained from scratch. Following the methodol-  
 253 ogy of Karras et al. [27], we generate 150k images from each model and we report the minimum FID  
 254 computed on three sets of 50k images each. We keep checkpoints during training and we report FID  
 255 for 30k, 70k, 100k, 150k, 180k and 200k iterations in Table 1. We also report the best FID found for  
 256 each model, after evaluating checkpoints every 5k iterations (i.e. we evaluate 40 models spanning  
 257 200k steps of training). As shown in the Table, the proposed MP regularization yields improvements  
 258 throughout the training. In the case of CIFAR-10 (conditional and unconditional) where the re-trained  
 259 baseline was trained with exactly the same hyperparameters as the models in the EDM [27] paper,  
 260 our MDM models achieve a new state-of-the-art.

| Model                           |                      | 30k         | 70k         | 100k        | 150k        | 180k        | 200k        | Best        |
|---------------------------------|----------------------|-------------|-------------|-------------|-------------|-------------|-------------|-------------|
| <b>MDM-VP (Ours)</b>            | AFHQ                 | <b>3.00</b> | 2.44        | <b>2.30</b> | <b>2.31</b> | <b>2.25</b> | <b>2.44</b> | 2.21        |
| EDM-VP (retrained)              |                      | 3.27        | <b>2.41</b> | 2.61        | 2.43        | 2.29        | 2.61        | 2.26        |
| EDM-VP (reported)* <sup>3</sup> |                      |             |             |             |             |             |             | <b>1.96</b> |
| EDM-VE (reported)*              |                      |             |             |             |             |             |             | 2.16        |
| NCSNv3-VP (reported)*           |                      |             |             |             |             |             |             | 2.58        |
| NCSNv3-VE (reported)*           |                      |             |             |             |             |             |             | 18.52       |
| <b>MDM-VP (Ours)</b>            | CIFAR10<br>(cond.)   | <b>2.44</b> | <b>1.94</b> | <b>1.88</b> | 1.88        | <b>1.80</b> | <b>1.82</b> | <b>1.77</b> |
| EDM-VP (retrained)              |                      | 2.50        | 1.99        | 1.94        | <b>1.85</b> | 1.86        | 1.90        | 1.82        |
| EDM-VP (reported)               |                      |             |             |             |             |             |             | 1.79        |
| EDM-VE (reported)               |                      |             |             |             |             |             |             | 1.79        |
| NCSNv3-VP (reported)            |                      |             |             |             |             |             |             | 2.48        |
| NCSNv3-VE (reported)            |                      |             |             |             |             |             |             | 3.11        |
| <b>MDM-VP (Ours)</b>            | CIFAR10<br>(uncond.) | <b>2.83</b> | <b>2.21</b> | <b>2.14</b> | <b>2.08</b> | <b>1.99</b> | <b>2.03</b> | <b>1.95</b> |
| EDM-VP (retrained)              |                      | 2.90        | 2.32        | 2.15        | 2.09        | 2.01        | 2.13        | 2.01        |
| EDM-VP (reported)               |                      |             |             |             |             |             |             | 1.97        |
| EDM-VE (reported)               |                      |             |             |             |             |             |             | 1.98        |
| NCSNv3-VP (reported)            |                      |             |             |             |             |             |             | 3.01        |
| NCSNv3-VE (reported)            |                      |             |             |             |             |             |             | 3.77        |

Table 1: FID results for deterministic sampling, using the Karras et al. [27] second-order samplers. For the CIFAR-10 models, we do 35 function evaluations and for AFHQ 79.

We further show that our MP regularization can be applied on top of a pre-trained model. Specifically, we train a baseline EDM-VP model on FFHQ  $64 \times 64$  for 150k using vanilla Denoising Score Matching. We then do 5k steps of finetuning, with and without our MP regularization and we measure the FID score of both models. The baseline model achieves FID 2.68 while the model finetuned with MP regularization achieves 2.61. This experiment shows the potential of applying our MP regularization to pre-trained models, potentially even at large scale, e.g. we could apply this idea with text-to-image models such as Stable Diffusion [40]. We leave this direction for future work.

Uncurated samples from our best models on AFHQ, CIFAR-10 and FFHQ are given in Figures 2a, 2b and 8. One benefit of the deterministic samplers is the unique identifiability property [49]. Intuitively, this means that by using the same noise and the same deterministic sampler, we can directly compare visually models that might have been trained in completely different ways. We select a couple of images from Figure 2a (AFHQ generations) and we compare the generated images from our model with the ones from the EDM baseline for the same noises. The results are shown in Figure 3. As shown, the MP regularization fixes several geometric inconsistencies for the picked images. We underline that the shown images are examples for which MP regularization helped and that potentially there are images for which the baseline models give more realistic results.

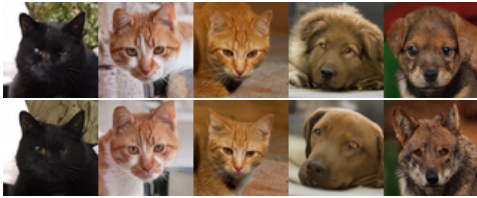

Figure 3: Visual comparison of EDM model (top) and MDM model (Ours, bottom) using deterministic sampling initiated with the same noise. As seen, the MP regularization fixes several geometric inconsistencies and artifacts in the generated images.

| Model                                       | FID   |
|---------------------------------------------|-------|
| EDM (baseline)                              | 5.81  |
| MDM, all times $t$                          | 5.45  |
| MDM, for some $t$                           | 6.59  |
| MDM, for some $t$<br>early stopped sampling | 14.52 |

Table 2: Ablation study on removing the DSM loss for some  $t$ . Table reports FID results after 10k steps of training in CIFAR-10.

**Ablation Study for Theoretical Predictions.** One interesting implication of Theorem 3.2 is that it suggests that we only need to learn the score perfectly on some fixed  $t_0$  and then the MP implies that the score is learned everywhere (for all  $t$  and in the whole space). This motivates the following



experiment: instead of using as our loss the weighted sum of DSM and our MP regularization for all  $t$ , we will not use DSM for  $t \leq t_{\text{threshold}}$ , for some  $t_{\text{threshold}}$  that we test our theory for.

We pick  $t_{\text{threshold}}$  such that for 20% of the diffusion (on the side of clean images), we do not train with DSM. For the rest 80% we train with both DSM and our MP regularization. Since this is only an ablation study, we train for only 10k steps on (conditional) CIFAR-10. We report FID numbers for three models: i) training with only DSM, ii) training with DSM and MP regularization everywhere, iii) training with DSM for 80% of times  $t$  and MP regularization everywhere. In our reported models, we also include FID of an early stopped sampling of the latter model, i.e. we do not run the sampling for  $t < t_{\text{threshold}}$  and we just output  $h_{\theta}(x_{t_{\text{threshold}}}, t_{\text{threshold}})$ . The numbers are summarized in Table 2. As shown, the theory is predictive since early stopping the generation at time  $t$  gives significantly worse results than continuing the sampling through the times that were never explicitly trained for approximating the score (i.e. we did not use DSM for those times). That said, the best results are obtained by combining DSM and our MP regularization everywhere, which is what we did for all the other experiments in the paper.

## 6 Related Work

The fact that imperfect learning of the score function introduces a shift between the training and the sampling distribution has been well known. Chen et al. [5, 6] analyze how the  $l_2$  error in the approximation of the score function propagates to Total Variation distance error bounds between the true and the learned distribution. Several methods for mitigating this issue have been proposed, but the majority of the attempts focus on changing the sampling process [49, 27, 23, 44]. A related work is the Analog-Bits paper [7] that conditions the model during training with past model predictions.

Karras et al. [27] discusses potential violations of invariances, such as the non-conservativity of the induced vector field, due to imperfect score matching. However, they do not formally test or enforce this property. Lai et al. [32] study the problem of regularizing diffusion models to satisfy the Fokker-Planck equation. While we show in Theorem 3.2 that perfect conservative training enforces the Fokker-Planck equation, we notice that their training method is different: they suggest to enforce the equation locally by using the finite differences method to approximate the derivatives. Further, they do not train on drifted data. Instead, we notice that our MP loss is well suited to handle drifted data since it operates across trajectories generated by the model. A concurrent work by Song et al. [50] proposes a new class of generative models that map each noisy iterate of the diffusion trajectory to the same image. This idea resembles the consistency in the model outputs that we enforce through MP, but we only require this on expectation and this helps us correct the diffusion sampling drift.

## 7 Conclusions and Future Work

We proposed an objective that enforces the trained network to follow a reverse Martingale, thereby having self-consistent predictions over time. We optimize this objective with points from the sampling distribution, effectively reducing the sampling drift observed in prior empirical works. Theoretically, we show that MP implies that we are sampling from the reverse of some diffusion process. Together with the assumption that the network has learned the score correctly in a subset of the domain, we can prove that MP (together with conservativity of the vector field) implies that the score is learned correctly everywhere - in the limit where the error approaches zero. Empirically, we use our objective to obtain state-of-the-art for CIFAR-10 and baseline improvements on AFHQ and FFHQ.

There are limitations of our method and several directions for future work. The proposed regularization increases the training time by approximately 1.5x. It would be interesting to explore how to enforce MP in more effective ways in future work. Further, our method does not test nor enforce that the induced vector-field is conservative, which is a key theoretical assumption. Our method guarantees only indirectly improve the performance in the samples from the learned distribution by enforcing some invariant. Finally, our theoretical result holds in the limit where the error of our regularized objective approaches zero and it would be meaningful to theoretically study also the constant-error regime.

## References

- [1] Namrata Anand and Tudor Achim. Protein structure and sequence generation with equivariant denoising diffusion probabilistic models. *arXiv preprint arXiv:2205.15019*, 2022.
- [2] Brian D.O. Anderson. Reverse-time diffusion equation models. *Stochastic Processes and their Applications*, 12(3):313–326, 1982.
- [3] Marius Arvinte, Ajil Jalal, Giannis Daras, Eric Price, Alex Dimakis, and Jonathan I Tamir. Single-shot adaptation using score-based models for mri reconstruction. In *International Society for Magnetic Resonance in Medicine, Annual Meeting*, 2022.
- [4] Arpit Bansal, Eitan Borgnia, Hong-Min Chu, Jie S Li, Hamid Kazemi, Furong Huang, Micah Goldblum, Jonas Geiping, and Tom Goldstein. Cold Diffusion: Inverting arbitrary image transforms without noise. *arXiv preprint arXiv:2208.09392*, 2022.
- [5] Sitan Chen, Sinho Chewi, Jerry Li, Yuanzhi Li, Adil Salim, and Anru R Zhang. Sampling is as easy as learning the score: theory for diffusion models with minimal data assumptions. *arXiv preprint arXiv:2209.11215*, 2022.
- [6] Sitan Chen, Giannis Daras, and Alexandros G Dimakis. Restoration-degradation beyond linear diffusions: A non-asymptotic analysis for ddim-type samplers. *arXiv preprint arXiv:2303.03384*, 2023.
- [7] Ting Chen, Ruixiang Zhang, and Geoffrey Hinton. Analog bits: Generating discrete data using diffusion models with self-conditioning. *arXiv preprint arXiv:2208.04202*, 2022.
- [8] Gabriele Corso, Hannes Stärk, Bowen Jing, Regina Barzilay, and Tommi Jaakkola. Diffdock: Diffusion steps, twists, and turns for molecular docking. *arXiv preprint arXiv:2210.01776*, 2022.
- [9] Giannis Daras and Alexandros G Dimakis. Multiresolution textual inversion. *arXiv preprint arXiv:2211.17115*, 2022.
- [10] Giannis Daras, Yuval Dagan, Alexandros G Dimakis, and Constantinos Daskalakis. Score-guided intermediate layer optimization: Fast langevin mixing for inverse problem. *arXiv preprint arXiv:2206.09104*, 2022.
- [11] Giannis Daras, Mauricio Delbracio, Hossein Talebi, Alexandros G Dimakis, and Peyman Milanfar. Soft diffusion: Score matching for general corruptions. *arXiv preprint arXiv:2209.05442*, 2022.
- [12] Jacob Deasy, Nikola Simidjievski, and Pietro Liò. Heavy-tailed denoising score matching. *arXiv preprint arXiv:2112.09788*, 2021.
- [13] Prafulla Dhariwal and Alexander Nichol. Diffusion models beat gans on image synthesis. *Advances in Neural Information Processing Systems*, 34:8780–8794, 2021.
- [14] Bradley Efron. Tweedie’s formula and selection bias. *Journal of the American Statistical Association*, 106(496):1602–1614, 2011.
- [15] Rinon Gal, Yuval Alaluf, Yuval Atzmon, Or Patashnik, Amit H. Bermano, Gal Chechik, and Daniel Cohen-Or. An image is worth one word: Personalizing text-to-image generation using textual inversion, 2022. URL <https://arxiv.org/abs/2208.01618>.
- [16] Ulf Grenander and Michael I Miller. Representations of knowledge in complex systems. *Journal of the Royal Statistical Society: Series B (Methodological)*, 56(4):549–581, 1994.
- [17] Jonathan Ho, Ajay Jain, and Pieter Abbeel. Denoising diffusion probabilistic models. *Advances in Neural Information Processing Systems*, 33:6840–6851, 2020.
- [18] Jonathan Ho, William Chan, Chitwan Saharia, Jay Whang, Ruiqi Gao, Alexey Gritsenko, Diederik P Kingma, Ben Poole, Mohammad Norouzi, David J Fleet, et al. Imagen video: High definition video generation with diffusion models. *arXiv preprint arXiv:2210.02303*, 2022.

- [19] Jonathan Ho, Tim Salimans, Alexey Gritsenko, William Chan, Mohammad Norouzi, and David J Fleet. Video diffusion models. *arXiv:2204.03458*, 2022.
- [20] Wenyi Hong, Ming Ding, Wendi Zheng, Xinghan Liu, and Jie Tang. Cogvideo: Large-scale pretraining for text-to-video generation via transformers. *arXiv preprint arXiv:2205.15868*, 2022.
- [21] Emiel Hooeboom and Tim Salimans. Blurring diffusion models. *arXiv preprint arXiv:2209.05557*, 2022.
- [22] Ajil Jalal, Marius Arvinte, Giannis Daras, Eric Price, Alexandros G Dimakis, and Jon Tamir. Robust compressed sensing mri with deep generative priors. *Advances in Neural Information Processing Systems*, 34:14938–14954, 2021.
- [23] Alexia Jolicoeur-Martineau, Ke Li, Rémi Piché-Taillefer, Tal Kachman, and Ioannis Mitliagkas. Gotta go fast when generating data with score-based models. *arXiv preprint arXiv:2105.14080*, 2021.
- [24] Tero Karras, Samuli Laine, and Timo Aila. A style-based generator architecture for generative adversarial networks. In *Proceedings of the IEEE/CVF conference on computer vision and pattern recognition*, pages 4401–4410, 2019.
- [25] Tero Karras, Samuli Laine, Miika Aittala, Janne Hellsten, Jaakko Lehtinen, and Timo Aila. Analyzing and improving the image quality of stylegan. In *Proceedings of the IEEE/CVF conference on computer vision and pattern recognition*, pages 8110–8119, 2020.
- [26] Tero Karras, Miika Aittala, Samuli Laine, Erik Härkönen, Janne Hellsten, Jaakko Lehtinen, and Timo Aila. Alias-free generative adversarial networks. *Advances in Neural Information Processing Systems*, 34:852–863, 2021.
- [27] Tero Karras, Miika Aittala, Timo Aila, and Samuli Laine. Elucidating the design space of diffusion-based generative models. *arXiv preprint arXiv:2206.00364*, 2022.
- [28] Dongjun Kim, Seungjae Shin, Kyungwoo Song, Wanmo Kang, and Il-Chul Moon. Soft truncation: A universal training technique of score-based diffusion model for high precision score estimation. In *International Conference on Machine Learning*, pages 11201–11228. PMLR, 2022.
- [29] Kwanyoung Kim and Jong Chul Ye. Noise2score: tweedie’s approach to self-supervised image denoising without clean images. *Advances in Neural Information Processing Systems*, 34: 864–874, 2021.
- [30] Diederik Kingma, Tim Salimans, Ben Poole, and Jonathan Ho. Variational diffusion models. *Advances in neural information processing systems*, 34:21696–21707, 2021.
- [31] Zhifeng Kong, Wei Ping, Jiaji Huang, Kexin Zhao, and Bryan Catanzaro. Diffwave: A versatile diffusion model for audio synthesis. In *International Conference on Learning Representations*, 2021.
- [32] Chieh-Hsin Lai, Yuhta Takida, Naoki Murata, Toshimitsu Uesaka, Yuki Mitsufuji, and Stefano Ermon. Regularizing score-based models with score fokker-planck equations. In *NeurIPS 2022 Workshop on Score-Based Methods*, 2022.
- [33] Calvin Luo. Understanding diffusion models: A unified perspective. *arXiv preprint arXiv:2208.11970*, 2022.
- [34] Chenlin Meng, Yang Song, Wenzhe Li, and Stefano Ermon. Estimating high order gradients of the data distribution by denoising. *Advances in Neural Information Processing Systems*, 34: 25359–25369, 2021.
- [35] Sachit Menon, Alexandru Damian, Shijia Hu, Nikhil Ravi, and Cynthia Rudin. Pulse: Self-supervised photo upsampling via latent space exploration of generative models. In *Proceedings of the IEEE/CVF conference on computer vision and pattern recognition*, pages 2437–2445, 2020.

- 422 [36] Eliya Nachmani, Robin San Roman, and Lior Wolf. Denoising diffusion gamma models. *arXiv*  
423 *preprint arXiv:2110.05948*, 2021.
- 424 [37] Alexander Quinn Nichol and Prafulla Dhariwal. Improved denoising diffusion probabilistic  
425 models. In *International Conference on Machine Learning*, pages 8162–8171. PMLR, 2021.
- 426 [38] Ben Poole, Ajay Jain, Jonathan T. Barron, and Ben Mildenhall. Dreamfusion: Text-to-3d using  
427 2d diffusion. *arXiv*, 2022.
- 428 [39] Aditya Ramesh, Prafulla Dhariwal, Alex Nichol, Casey Chu, and Mark Chen. Hierarchical  
429 text-conditional image generation with clip latents. *arXiv preprint arXiv:2204.06125*, 2022.
- 430 [40] Robin Rombach, Andreas Blattmann, Dominik Lorenz, Patrick Esser, and Björn Ommer. High-  
431 resolution image synthesis with latent diffusion models. In *Proceedings of the IEEE/CVF*  
432 *Conference on Computer Vision and Pattern Recognition*, pages 10684–10695, 2022.
- 433 [41] Nataniel Ruiz, Yuanzhen Li, Varun Jampani, Yael Pritch, Michael Rubinstein, and Kfir Aberman.  
434 Dreambooth: Fine tuning text-to-image diffusion models for subject-driven generation. 2022.
- 435 [42] Chitwan Saharia, William Chan, Saurabh Saxena, Lala Li, Jay Whang, Emily Denton, Seyed  
436 Kamyar Seyed Ghasemipour, Burcu Karagol Ayan, S Sara Mahdavi, Rapha Gontijo Lopes, et al.  
437 Photorealistic text-to-image diffusion models with deep language understanding. *arXiv preprint*  
438 *arXiv:2205.11487*, 2022.
- 439 [43] Arne Schneuing, Yuanqi Du, Charles Harris, Arian Jamasb, Ilia Igashov, Weitao Du, Tom  
440 Blundell, Pietro Lió, Carla Gomes, Max Welling, et al. Structure-based drug design with  
441 equivariant diffusion models. *arXiv preprint arXiv:2210.13695*, 2022.
- 442 [44] Vikash Sehwal, Caner Hazirbas, Albert Gordo, Firat Ozgenel, and Cristian Canton. Generating  
443 high fidelity data from low-density regions using diffusion models. In *Proceedings of the*  
444 *IEEE/CVF Conference on Computer Vision and Pattern Recognition*, pages 11492–11501,  
445 2022.
- 446 [45] Jascha Sohl-Dickstein, Eric Weiss, Niru Maheswaranathan, and Surya Ganguli. Deep unsuper-  
447 vised learning using nonequilibrium thermodynamics. In *International Conference on Machine*  
448 *Learning*, pages 2256–2265. PMLR, 2015.
- 449 [46] Jiaming Song, Chenlin Meng, and Stefano Ermon. Denoising diffusion implicit models. In  
450 *International Conference on Learning Representations*, 2021.
- 451 [47] Yang Song and Stefano Ermon. Generative modeling by estimating gradients of the data  
452 distribution. *Advances in Neural Information Processing Systems*, 32, 2019.
- 453 [48] Yang Song and Stefano Ermon. Improved techniques for training score-based generative models.  
454 *Advances in neural information processing systems*, 33:12438–12448, 2020.
- 455 [49] Yang Song, Jascha Sohl-Dickstein, Diederik P Kingma, Abhishek Kumar, Stefano Ermon, and  
456 Ben Poole. Score-based generative modeling through stochastic differential equations. In  
457 *International Conference on Learning Representations*, 2021.
- 458 [50] Yang Song, Prafulla Dhariwal, Mark Chen, and Ilya Sutskever. Consistency models. *arXiv*  
459 *preprint arXiv:2303.01469*, 2023.
- 460 [51] Brian L Trippe, Jason Yim, Doug Tischer, Tamara Broderick, David Baker, Regina Barzilay,  
461 and Tommi Jaakkola. Diffusion probabilistic modeling of protein backbones in 3d for the  
462 motif-scaffolding problem. *arXiv preprint arXiv:2206.04119*, 2022.
- 463 [52] Pascal Vincent. A connection between score matching and denoising autoencoders. *Neural*  
464 *computation*, 23(7):1661–1674, 2011.

## 465 A Proof of Theorem 3.2

466 In Section A.1 we present a proof overview, in Section A.2 we present some preliminaries to the proof,  
467 in Section A.3 we include the proof, with proofs of some lemmas ommitted and in the remaining  
468 sections we prove these lemmas.

### 469 A.1 Proof overview

470 We start with the first part of the theorem. We assume that  $h$  satisfies Properties 1 and 2 and we will  
471 show that  $h$  is defined by Eq. (2) for some distribution  $p_0$  (while the other direction in the equivalence  
472 follows trivially from the definitions of these properties). Motivated by Eq. (6), define the function  
473  $s: \mathbb{R}^d \times (0, 1]$  according to

$$s(x, t) = \frac{h(x, t) - x}{\sigma_t^2}. \quad (9)$$

474 We will first show that  $s$  satisfies the partial differential equation

$$\frac{\partial s}{\partial t} = g(t)^2 \left( J_s s + \frac{1}{2} \Delta s \right), \quad (10)$$

475 where  $J_s \in \mathbb{R}^{d \times d}$  is the Jacobian of  $s$ ,  $(J_s)_{ij} = \frac{\partial s_i}{\partial x_j}$  and each coordinate  $i$  of  $\Delta s \in \mathbb{R}^d$  is the  
476 Laplacian of coordinate  $i$  of  $s$ ,  $(\Delta s)_i = \sum_{j=1}^n \frac{\partial^2 s_i}{\partial x_j^2}$ . In order to obtain Eq. (10), first, we use a  
477 generalization of Ito's lemma, which states that for an SDE

$$dx_t = \mu(x_t, t)dt + g(t)d\bar{B}_t \quad (11)$$

478 and for  $f: \mathbb{R}^d \times [0, 1] \rightarrow \mathbb{R}$ ,  $f(x_t, t)$  satisfies the SDE

$$df(x_t, t) = \left( \frac{\partial f}{\partial t} + J_f \mu - \frac{g(t)^2}{2} \Delta f \right) dt + g(t) J_f d\bar{B}_t.$$

479 If  $f$  is a reverse-Martingale then the term that multiplies  $dt$  has to equal zero, namely,

$$\frac{\partial f}{\partial t} + J_f \mu - \frac{g(t)^2}{2} \Delta f = 0.$$

480 By Lemma 3.1,  $h(x_t, t)$  is a reverse Martingale, therefore we can substitute  $f = h$  and substitute  
481  $\mu = -g(t)^2 s$  according to Eq. (7), to deduce that

$$\frac{\partial h}{\partial t} - g(t)^2 J_h s - \frac{g(t)^2}{2} \Delta h = 0.$$

482 Substituting  $h(x, t) = \sigma_t^2 s(x, t) + x$  according to Eq. (6) yields Eq. (10) as required.

483 Next, we show that any  $s'$  that is the score-function (i.e. gradient of log probability) of some diffusion  
484 process that follows the SDE Eq. (4), also satisfies Eq. (10). To obtain this, one can use the Fokker-  
485 Planck equation, whose special case states that the density function  $p(x, t)$  of any stochastic process  
486 that satisfies the SDE Eq. (4) satisfies the PDE

$$\frac{\partial p}{\partial t} = \frac{g(t)^2}{2} \Delta p$$

487 where  $\Delta$  corresponds to the Laplacian operator. Using this one can obtain a PDE for  $\nabla_x \log p$  which  
488 happens to be exactly Eq. (10) if the process is defined by Eq. (4).

489 Next, we use Property 2 to deduce that there exists some densities  $p(\cdot, t)$  for  $t \in [0, 1]$  such that

$$s(x, t) = \frac{h(x, t) - x}{\sigma_t^2} = \nabla_x \log p(x, t).$$

490 Denote by  $p'(x, t)$  the score function of the diffusion process that is defined by the SDE of Eq. (4)  
491 with the initial condition that  $p(x, 0) = p'(x, 0)$  for all  $x$ . Denote by  $s'(x, t) = \nabla_x \log p'(x, t)$  the  
492 score function of  $p'$ . As we proved above, both  $s$  and  $s'$  satisfy the PDE Eq. (10) and the same initial

condition at  $t = 0$ . By the uniqueness of the PDE, it holds that  $s(x, t) = s'(x, t)$  for all  $t \geq t_0$ . Denote by  $h^*$  the function that satisfies Eq. (2) with the initial condition  $x_0 \sim p_0$ . By Eq. (6),

$$s'(x, t) = \frac{h^*(x, t) - x}{\sigma_t^2}.$$

By Eq. (9) and since  $s = s'$ , it follows that  $h = h^*$  and this is what we wanted to prove.

We proceed with proving part 2 of the theorem. We use the notion of an *analytic function* on  $\mathbb{R}^d$ : that is a function  $f: \mathbb{R}^d \rightarrow \mathbb{R}$  such that at any  $x_0 \in \mathbb{R}^d$ , the Taylor series of  $f$  centered at  $x_0$  converges for all  $x \in \mathbb{R}^d$  to  $f(x)$ . We use the property that an analytic function is uniquely determined by its value on any open subset: *If  $f$  and  $g$  are analytic functions that identify in some open subset  $U \subset \mathbb{R}^d$  then  $f = g$  everywhere.* We prove this statement in the remainder of this paragraph, as follows: Represent  $f$  and  $g$  as Taylor series around some  $x_0 \in U$ . The Taylor series of  $f$  and  $g$  identify: indeed, these series are functions of the derivatives of  $f$  and  $g$  which are functions of only the values in  $U$ . Since  $f$  and  $g$  equal their Taylor series, they are equal.

Next, we will show that for any diffusion process that is defined by Eq. (4), the probability density of  $p(x, t_0)$  at any time  $t_0 > 0$  is analytic as a function of  $x$ . Recall that the distribution of  $x_0$  is defined in Eq. (4) as  $p_0$  and it holds that the distribution of  $x_{t_0}$  is obtained from  $p_0$  by adding a Gaussian noise  $N(0, \sigma_t^2 I)$  and its density at any  $x$  equals

$$p(x, t_0) = \int_{a \in \mathbb{R}^d} \frac{1}{\sqrt{2\pi}\sigma_{t_0}} \exp\left(-\frac{(x-a)^2}{2\sigma_{t_0}^2}\right) dp_0(a).$$

Since the function  $\exp(-(x-a)^2/(2\sigma_t^2))$  is analytic, one could deduce that  $p(x, t_0)$  is also analytic. Further,  $p(x, t_0) > 0$  for all  $x$  which implies that there is no singularity for  $\log p(x, t_0)$  which can be used to deduce that  $\log p(x, t_0)$  is also analytic and further that  $\nabla_x \log p(x, t_0)$  is analytic as well.

We use the first part of the theorem to deduce that  $s$  is the score function of some diffusion process hence it is analytic. By assumption,  $s$  identifies with some target score function  $s^*$  in some open subset  $U \subseteq \mathbb{R}^d$  at some  $t_0$ , which, by the fact that  $s(x, t_0)$  and  $s^*(x, t_0)$  are analytic, implies that  $s(x, t_0) = s^*(x, t_0)$  for all  $x$ . Finally, since  $s$  and  $s^*$  both satisfy the PDE Eq. (10) and they satisfy the same initial condition at  $t_0$ , it holds that by uniqueness of the PDE  $s(x, t) = s^*(x, t)$  for all  $x$  and  $t$ .

## A.2 Preliminaries

**Preliminaries on diffusion processes** In the next definition we define for a function  $F: \mathbb{R}^d \rightarrow \mathbb{R}^d$  its Jacobian  $J_F$ , its divergence  $\nabla \cdot F$  and its Laplacian  $\triangle F$  that is computed separately on each coordinate of  $F$ :

**Definition A.1.** Given a function  $F = (f_1, \dots, f_n): \mathbb{R}^d \rightarrow \mathbb{R}^d$ , denote by  $J_F: \mathbb{R}^d \rightarrow \mathbb{R}^{d \times d}$  its Jacobian:

$$(J_F)_{ij} = \frac{\partial f_i(x)}{\partial x_j}.$$

The *divergence* of  $F$  is defined as

$$\nabla \cdot F(x) := \sum_{i=1}^n \frac{\partial f_i(x)}{\partial x_i}.$$

Denote by  $\triangle F: \mathbb{R}^d \rightarrow \mathbb{R}^d$  the function whose  $i$ th entry is the Laplacian of  $f_i$ :

$$(\triangle F(x))_i = \sum_{j=1}^n \frac{\partial^2 f_i(x)}{\partial x_j^2}.$$

If  $F$  is a function of both  $x \in \mathbb{R}^d$  and  $t \in \mathbb{R}$ , then  $J_F$ ,  $\triangle f$  and  $\nabla \cdot F$  correspond to  $F$  as a function of  $x$ , whereas  $t$  is kept fixed. In particular,

$$(J_F(x, t))_{ij} = \frac{\partial f_i(x, t)}{\partial x_j}, \quad (\triangle F(x, t))_i = \sum_{j=1}^n \frac{\partial^2 f_i(x, t)}{\partial x_j^2}, \quad \nabla \cdot F = \sum_{i=1}^n \frac{\partial f_i(x, t)}{\partial x_i}.$$

527 We use the celebrated Ito's lemma and some of its immediate generalizations:

528 **Lemma A.2** (Ito's Lemma). *Let  $x_t$  be a stochastic process  $x_t \in \mathbb{R}^d$ , that is defined by the following*  
 529 *SDE:*

$$dx_t = \mu(x_t, t)dt + g(t)dB_t,$$

530 *where  $B_t$  is a standard Brownian motion. Let  $f: \mathbb{R}^d \times \mathbb{R} \rightarrow \mathbb{R}$ . Then,*

$$df(x_t, t) = \left( \frac{df}{dt} + \nabla_x f^\top \mu(x_t, t) + \frac{g(t)^2}{2} \Delta f \right) dt + g(t) \nabla_x f^\top dB_t.$$

531 *Further, if  $F: \mathbb{R}^d \times \mathbb{R} \rightarrow \mathbb{R}^d$  is a multi-valued function, then*

$$dF(x_t, t) = \left( \frac{dF}{dt} + J_F \mu + \frac{g(t)^2}{2} \Delta F \right) dt + g(t) J_F dB_t.$$

532 *Lastly, if  $x_t$  is instead defined with a reverse noise,*

$$dx_t = \mu(x_t, t)dt + g(t)d\bar{B}_t,$$

533 *then the multi-valued Ito's lemma is modified as follows:*

$$dF(x_t, t) = \left( \frac{dF}{dt} + J_F \mu - \frac{g(t)^2}{2} \Delta F \right) dt + g(t) J_F d\bar{B}_t. \quad (12)$$

534 Lastly, we present the Fokker-Planck equation which states that the probability distribution that  
 535 corresponds to diffusion processes satisfy a certain partial differential equation:

536 **Lemma A.3** (Fokker-Planck equation). *Let  $x_t$  be defined by*

$$dx_t = \mu(x_t, t)dt + g(t)dB_t,$$

537 *where  $x_t, \mu(x, t) \in \mathbb{R}^d$  and  $B_t$  is a Brownian motion in  $\mathbb{R}^d$ . Denote by  $p(x, t)$  the density at point  $x$*   
 538 *on time  $t$ . Then,*

$$\frac{\partial}{\partial t} p(x, t) = -\nabla \cdot (\mu(x, t)p(x, t)) + \frac{g(t)^2}{2} \Delta p(x, t) = -p \nabla \cdot \mu - \mu \nabla \cdot p + \frac{g(t)^2}{2} \Delta p.$$

### 539 Preliminaries on analytic functions

540 **Definition A.4.** A function  $f: \mathbb{R}^d \rightarrow \mathbb{R}$  is analytic on  $\mathbb{R}^d$  if for any  $x_0, x \in \mathbb{R}^d$ , the Taylor series  
 541 of  $f$  around  $x_0$ , evaluated at  $x$ , converges to  $f(x)$ . We say that  $F = (f_1, \dots, f_n): \mathbb{R}^d \rightarrow \mathbb{R}^d$  is an  
 542 analytic function if  $f_i$  is analytic for all  $i \in \{1, \dots, n\}$ .

543 The following holds:

544 **Lemma A.5.** *If  $F, G: \mathbb{R}^d \rightarrow \mathbb{R}^d$  are two analytic functions and if  $F = G$  for all  $x \in U$  where*  
 545  *$U \subseteq \mathbb{R}^d$ ,  $U \neq \emptyset$ , is an open set, then  $F = G$  on all  $\mathbb{R}^d$ .*

546 This is a well known result and a proof sketch was given in Section 3.

547 **The heat equation.** The following is a Folklore lemma on the uniqueness of the solutions to the  
 548 heat equation:

549 **Lemma A.6.** *Let  $p$  and  $p'$  be two continuous functions on  $\mathbb{R}^d \times [t_0, 1]$  that satisfy the heat equation*

$$\frac{\partial p}{\partial t} = \frac{g(t)^2}{2} \Delta p. \quad (13)$$

550 *Further, assume that  $p(\cdot, t_0) = p'(\cdot, t_0)$ . Then,  $p = p'$  for all  $t \in [t_0, 1]$ .*

### 551 A.3 Main proof

552 In what appears below we denote

$$s(x, t) := \frac{h(x, t) - x}{\sigma_t^2}. \quad (14)$$

553 We start by claiming that if  $h$  satisfies Property 1, then  $s$  satisfies the PDE Eq. (10): (proof in  
 554 Section A.4)

555 **Lemma A.7.** *Let  $h$  satisfy Property 1 and define  $s$  according to Eq. (14). Then,  $s$  satisfies Eq. (10).*

556 Next, we claim that the score function of any diffusion process satisfies the PDE Eq. (10): (proof in  
557 Section A.5)

558 **Lemma A.8.** *Let  $s$  be the score function of some diffusion process that is defined by Eq. (4). Then,  $s$   
559 satisfies the PDE Eq. (10).*

560 To complete the first part of the proof, denote by  $p(\cdot, t)$  the probability distribution such that  $s(x, t) =$   
561  $\nabla \log p(x, t)$ , whose existence follows from Property 2. We would like to argue that  $\{p(\cdot, t)\}_{t \in (0, 1]}$   
562 corresponds the probability density of the diffusion

$$dx_t = g(t)dB_t. \quad (15)$$

563 It suffices to show that for any  $t_0 > 0$ ,  $\{p(\cdot, t)\}_{t \in (t_0, 1]}$  corresponds to the same diffusion. To show the  
564 latter, let  $t_0 \in (0, 1)$  and consider the diffusion process according to Eq. (15) with the initial condition  
565 that  $x_{t_0} \sim p(\cdot, t_0)$ . Denote its score function by  $s'$  and notice that it satisfies the PDE Eq. (10) and  
566 the initial condition  $s'(x, t_0) = \nabla_x \log p(x, t_0) = s(x, t_0)$ , where the first equality follows from  
567 the definition of a score function and the second from the construction of  $p(x, t_0)$ . Further, recall  
568 that  $s(x, t)$  satisfies the same PDE Eq. (10) by Lemma A.4. Next we will show that  $s = s'$  for all  
569  $t \in [t_0, 1]$ , and this will follow from the following lemma: (proof in Section A.6)

570 **Lemma A.9.** *Let  $s$  and  $s'$  be two solutions for the PDE (10) on the domain  $\mathbb{R}^d \times [t_0, 1]$  that  
571 satisfy the same initial condition at  $t_0$ :  $s(x, t_0) = s'(x, t_0)$  for all  $x$ . Further, assume that for all  
572  $t \in [t_0, 1]$  there exist probability densities  $p(\cdot, t)$  and  $p'(\cdot, t)$  such that  $s(x, t) = \nabla_x \log p(x, t)$  and  
573  $s'(x, t) = \nabla_x \log p'(x, t)$  for all  $x$ . Then,  $s = s'$  on all of  $\mathbb{R}^d \times [t_0, 1]$ .*

574 Then, by uniqueness of the PDE one obtains that  $s = s'$  for all  $t \in [t_0, 1]$ . Hence,  $s$  is the score of a  
575 diffusion for all  $t \geq t_0$  and this holds for any  $t_0 > 0$ , hence this holds for any  $t > 0$ . This concludes  
576 the proof of the first part of the theorem.

577 For the second part, let  $s^*$  denote some score function of a diffusion process that satisfies Eq. (4).  
578 Assume that for some  $t_0 > 0$  and some open subset  $U \subseteq \mathbb{R}^d$ ,  $s = s^*$ , namely  $s(x, t_0) = s^*(x, t_0)$   
579 for all  $t_0 > 0$  and all  $x \in U$ . First, we would like to argue that if  $s(x, t)$  is the score function of  
580 some diffusion process that satisfies Eq. (4), then for any  $t_0 > 0$  it holds that  $s(x, t_0)$  is an analytic  
581 function (proof in Section A.7)

582 **Lemma A.10.** *Let  $x_t$  obey the SDE Eq. (4) with the initial condition  $x_0 \sim \mu_0$ . Let  $t > 0$  and let  
583  $s(x, t)$  denote the score function of  $x_t$ , namely,  $s(x, t) = \nabla_x \log p(x, t)$  where  $p(x, t)$  is the density  
584 of  $x_t$ . Assume that  $\mu_0$  is a bounded-support distribution. Then,  $s(x, t)$  is an analytic function.*

585 Since both  $s$  and  $s^*$  are scores of diffusion processes, then  $s(x, t_0)$  and  $s^*(x, t_0)$  are analytic functions.  
586 Using the fact that  $s = s^*$  on  $U \times \{t_0\}$  and using Lemma A.5 we derive that  $s(x, t_0) = s^*(x, t_0)$   
587 for all  $x$ . Let  $p$  and  $p^*$  denote the densities that correspond to the score functions  $s$  and  $s^*$  and by  
588 definition of a score function, we obtain that for all  $x$ ,

$$\nabla \log p(x, t_0) = s(x, t_0) = s^*(x, t_0) = \nabla \log p^*(x, t_0),$$

589 which implies, by integration, that

$$\log p(x, t_0) = \log p^*(x, t_0) + c$$

590 for some constant  $c \in \mathbb{R}$ . However,  $c = 0$ . Indeed,

$$1 = \int p(x, t_0) dx = \int e^{\log p(x, t_0)} dx = \int e^{\log p^*(x, t_0) + c} dx = \int p^*(x, t_0) e^c dx = e^c,$$

591 which implies that  $c = 0$  as required. As a consequence, the following lemma implies that  $p(x, 0) =$   
592  $p^*(x, 0)$  for all  $x$  (proof in Section A.8):

593 **Lemma A.11.** *Let  $x_t$  and  $y_t$  be stochastic processes that follow Eq. (4) with initial conditions  
594  $x_0 \sim \mu_0$  and  $y_0 \sim \mu'_0$  and assume that  $\mu_0$  and  $\mu'_0$  are bounded-support. Assume that for some  $t_0 > 0$ ,  
595  $x_{t_0}$  and  $y_{t_0}$  have the same distribution. Then,  $\mu_0 = \mu'_0$ .*

596 Without loss of generality, one can replace 0 with any  $\tilde{t} \in (0, t_0)$ , to obtain that  $p(x, \tilde{t}) = p^*(x, \tilde{t})$  for  
597 any  $\tilde{t} \in [0, t_0]$ . Now,  $p(x, t_0)$  is analytic, from Lemma A.5, hence it is continuous. Consequently,  
598 Lemma A.6 implies that  $p = p^*$  in  $\mathbb{R}^d \times [t_0, 1]$ . This concludes that  $p = p^*$  in all the domain, which  
599 implies that  $s = \nabla \log p = \nabla \log p^* = s^*$ , as required.



#### 600 A.4 Proof of Lemma A.7

601 We use Ito's lemma, and in particular Eq. (12), to get a PDE for the function  $h(x_t, t)$  where  $x_t$   
 602 satisfies the stochastic process

$$dx_t = -g(t)^2 s(x_t, t) dt + g(t) d\bar{B}_t.$$

603 Ito's formula yields that

$$dh(x_t, t) = \left( \frac{\partial h}{\partial t} - g(t)^2 J_F s - \frac{g(t)^2}{2} \Delta h \right) dt + \sigma J_h d\bar{B}_t.$$

604 Since  $(h, s)$  satisfies Property 1 and using Lemma 3.1,  $h$  is a reverse martingale which implies that  
 605 the term that multiplies  $dt$  has to equal zero. In particular, we have that

$$\frac{\partial h}{\partial t} - g(t)^2 J_h s - \frac{g(t)^2}{2} \Delta h = 0. \quad (16)$$

606 By Eq. (14),

$$s = \frac{h - x}{\sigma_t^2}.$$

607 Therefore,

$$h = x + \sigma_t^2 s.$$

608 Substituting this in Eq. (16) and using the relation  $d\sigma_t^2/dt = g(t)^2$  that follows from Eq. (14), one  
 609 obtains that

$$\begin{aligned} 0 &= \frac{\partial}{\partial t} (x + \sigma_t^2 s) - g(t)^2 J_{x+\sigma_t^2 s} s - \frac{g(t)^2}{2} \Delta (x + \sigma_t^2 s) \\ &= g(t)^2 s + \sigma_t^2 \frac{\partial s}{\partial t} - g(t)^2 (I + \sigma_t^2 J_s) s - \frac{g(t)^2 \sigma_t^2}{2} \Delta s \\ &= \sigma_t^2 \frac{\partial s}{\partial t} - g(t)^2 \sigma_t^2 J_s s - \frac{g(t)^2 \sigma_t^2}{2} \Delta s. \end{aligned}$$

610 Dividing by  $\sigma_t^2$ , we get that

$$\frac{\partial s}{\partial t} - g(t)^2 J_s s - \frac{g(t)^2}{2} \Delta s = 0,$$

611 which is what we wanted to prove.

#### 612 A.5 Proof of Lemma A.8

613 We present as a consequence of the Fokker-Plank equation (Lemma A.3) a PDE for the log density  
 614  $\log p$ :

615 **Lemma A.12.** *Let  $x_t$  be defined by*

$$dx_t = \mu(x_t, t) dt + g(t) dB_t.$$

616 *Then,*

$$\frac{\partial \log p}{\partial t} = -\nabla \cdot \mu - \mu \nabla \cdot \log p + \frac{g(t)^2 \|\nabla \log p\|^2}{2} + \frac{g(t)^2 \Delta \log p}{2}$$

617 *Proof.* We would like to replace the partial derivatives of  $p$  that appears in Lemma A.3 with the  
 618 partial derivatives of  $\log p$ . Using the formula

$$\frac{\partial \log p}{\partial t} = \frac{1}{p} \frac{\partial p}{\partial t},$$

619 one obtains that

$$\frac{\partial p}{\partial t} = p \frac{\partial \log p}{\partial t}.$$

620 Similarly,

$$\frac{\partial p}{\partial x_i} = p \frac{\partial \log p}{\partial x_i} \quad (17)$$

621 which also implies that

$$\nabla p = p \nabla \log p, \quad \nabla \cdot p = p \nabla \cdot \log p.$$

622 Differentiating Eq. (17) again with respect to  $x_i$  and applying Eq. (17) once more, one obtains that

$$\frac{\partial^2 p}{\partial x_i^2} = \frac{\partial}{\partial x_i} \left( p \frac{\partial \log p}{\partial x_i} \right) = \frac{\partial p}{\partial x_i} \frac{\partial \log p}{\partial x_i} + p \frac{\partial^2 \log p}{\partial x_i^2} = p \left( \left( \frac{\partial \log p}{\partial x_i} \right)^2 + \frac{\partial^2 \log p}{\partial x_i^2} \right).$$

623 Summing over  $i$ , one obtains that

$$\Delta p = p \sum_{i=1}^n \left( \left( \frac{\partial \log p}{\partial x_i} \right)^2 + \frac{\partial^2 \log p}{\partial x_i^2} \right) = p \|\nabla \log p\|^2 + p \Delta \log p. \quad (18)$$

624 Substituting the partials derivatives of  $p$  inside the Fokker-Planck equation in Lemma A.3, one obtains  
625 that

$$p \frac{\partial \log p}{\partial t} = -p \nabla \cdot \mu - \mu(p \nabla \cdot \log p) + \frac{g(t)^2}{2} (p \|\nabla \log p\|^2 + p \Delta \log p).$$

626 Dividing by  $p$ , one gets that

$$\frac{\partial \log p}{\partial t} = -\nabla \cdot \mu - \mu \nabla \cdot \log p + \frac{g(t)^2 \|\nabla \log p\|^2}{2} + \frac{g(t)^2 \Delta \log p}{2}.$$

627 as required.  $\square$

628 We are ready to prove Lemma A.8: Substituting  $\mu = 0$  in Lemma A.12, one obtains that

$$\frac{\partial \log p}{\partial t} = \frac{g(t)^2 \|\nabla \log p\|^2}{2} + \frac{g(t)^2 \Delta \log p}{2}.$$

629 Taking the gradient with respect to  $x$ , one obtains that

$$\nabla \frac{\partial \log p}{\partial t} = \frac{g(t)^2 \nabla \|\nabla \log p\|^2}{2} + \frac{g(t)^2 \nabla \Delta \log p}{2}. \quad (19)$$

630 Since  $\partial/\partial x_i$  commutes with  $\partial/\partial t$ , it holds that

$$\nabla \frac{\partial \log p}{\partial t} = \frac{\partial}{\partial t} \nabla \log p = \frac{\partial s}{\partial t}, \quad (20)$$

631 recalling that by definition  $s = \nabla \log p$ . Further,

$$\frac{\partial}{\partial x_i} \|\nabla \log p\|^2 = \sum_{j=1}^n \frac{\partial}{\partial x_i} \left( \frac{\partial \log p}{\partial x_j} \right)^2 = 2 \sum_{j=1}^n \frac{\partial^2 \log p}{\partial x_i \partial x_j} \frac{\partial \log p}{\partial x_j} = 2 (H_{\log p} \nabla \log p)_i,$$

632 where for any function  $f: \mathbb{R}^d \rightarrow \mathbb{R}$ ,  $H_f$  is the Hessian function of  $f$  that is defined by

$$(H_f)_{ij} = \frac{\partial^2 f}{\partial x_i \partial x_j}$$

633 This implies that

$$\nabla \|\nabla \log p\|^2 = 2 H_{\log p} \nabla \log p.$$

634 Further, notice that

$$H_f = J_{\nabla f},$$

635 which implies that

$$\nabla \|\nabla \log p\|^2 = 2 J_{\nabla \log p} \nabla \log p = 2 J_s s. \quad (21)$$

636 Lastly, we get that by the commutative property of partial derivatives,

$$\nabla \Delta \log p = \Delta \nabla \log p = \Delta s. \quad (22)$$

637 Substituting Eq. (20), Eq. (21) and Eq. (22) in Eq. (19), one obtains that

$$\frac{\partial s}{\partial t} = g(t)^2 J_s s + \frac{g(t)^2 \Delta s}{2},$$

638 as required.

639 **A.6 Proof of Lemma A.9**

640 We will prove that  $p$  and  $p'$  satisfy the same PDE (which is the heat equation). Recall that  $s$  and  $s'$   
641 satisfy

$$\frac{\partial s}{\partial t} = g(t)^2 \left( J_s s + \frac{1}{2} \Delta s \right) = \frac{g(t)^2}{2} (\nabla \|s\|^2 + \Delta s)$$

642 By substituting  $s = \nabla \log p$ ,

$$\frac{\partial \nabla \log p}{\partial t} = \frac{g(t)^2}{2} (\nabla \|\nabla \log p\|^2 + \Delta \nabla \log p).$$

643 By exchanging the order of derivatives, we obtain that

$$\nabla \frac{\partial \log p}{\partial t} = \nabla \frac{g(t)^2}{2} (\|\nabla \log p\|^2 + \Delta \log p).$$

644 By integrating, this implies that

$$\frac{\partial \log p}{\partial t} = \frac{g(t)^2}{2} (\|\nabla \log p\|^2 + \Delta \log p) + c(t),$$

645 where  $c(t)$  depends only on  $t$ . Eq. (18) shows that

$$\Delta \log p = \frac{\Delta p}{p} - \|\nabla \log p\|^2.$$

646 By substituting this in the equation above, we obtain that

$$\frac{\partial \log p}{\partial t} = \frac{g(t)^2}{2} \frac{\Delta p}{p} + c(t).$$

647 By multiplying both sides with  $p$ , we get that

$$\frac{\partial p}{\partial t} = p \frac{\partial \log p}{\partial t} = \frac{g(t)^2}{2} \Delta p + c(t). \quad (23)$$

648 Since  $p$  is a probability distribution,

$$\int_{\mathbb{R}^d} p(x, t) dx = 1,$$

649 therefore,

$$\int \frac{\partial p(x, t)}{\partial t} dx = \frac{\partial}{\partial t} \int_{\mathbb{R}^d} p(x, t) dx = \frac{\partial 1}{\partial t} = 0.$$

650 Integrating over Eq. (23) we obtain that

$$0 = \int \frac{g(t)^2}{2} \Delta p + c(t) dx = 0 + \int c(t) dx,$$

651 where the last equation holds since the integral of a Laplacian of probability density integrates to 0. It  
652 follows that  $c(t) = 0$  which implies that

$$\frac{\partial p}{\partial t} = \frac{g(t)^2}{2} \Delta p, \quad (24)$$

653 and the same PDE holds where  $p'$  replaces  $p$ , and this follows without loss of generality. Further,  
654 since  $\log p$  and  $\log p'$  are differentiable, it holds that  $p(\cdot, t)$  and  $p'(\cdot, t)$  are continuous for all fixed  
655  $t$ . This implies that  $p$  and  $p'$  are continuous as functions of  $x$  and  $t$  since they both satisfy the  
656 heat equation Eq. (13). Consequently, Lemma A.6 implies that  $p = p'$  on  $\mathbb{R}^d \times [t_0, 1]$ . Finally,  
657  $s = \nabla \log p = \nabla \log p' = s'$ , as required.

## 658 A.7 Proof of Lemma A.10

659 First, recall that since  $x_t$  satisfies Eq. (4) with the initial condition  $x_0 \sim \mu_0$ , then  $x_t \sim \mu_0 + N(0, \sigma_t^2 I)$ ,  
 660 namely,  $x_t$  is the addition of a random variable drawn from  $\mu_0$  and an independent Gaussian  
 661  $N(0, \sigma_t^2 I)$ . Therefore, the density of  $x_t$ , which we denote by  $p(x, t)$ , equals

$$p(x, a) = \mathbb{E}_{a \sim \mu_0} \left[ \frac{1}{\sqrt{2\pi}\sigma_t} \exp \left( -\frac{\|x - a\|^2}{2\sigma_t^2} \right) \right].$$

662 Using the equation

$$\nabla_x \log f(x) = \frac{\nabla_x f(x)}{f(x)},$$

663 we get that

$$s(x, a) = \nabla_x \log p(x, a) = \frac{\nabla_x p(x, a)}{p(x, a)} = \frac{\mathbb{E}_{a \sim \mu_0} \left[ \frac{1}{\sqrt{2\pi}\sigma_t} \frac{x-a}{\sigma_t^2} \exp \left( -\frac{\|x-a\|^2}{2\sigma_t^2} \right) \right]}{\mathbb{E}_{a \sim \mu_0} \left[ \frac{1}{\sqrt{2\pi}\sigma_t} \exp \left( -\frac{\|x-a\|^2}{2\sigma_t^2} \right) \right]} \quad (25)$$

664 By using the fact that the Taylor formula for  $e^x$  equals

$$e^x = \sum_{i=0}^{\infty} \frac{e^i}{i!},$$

665 we obtain that the right hand side of Eq. (25) equals

$$\frac{\mathbb{E}_{a \sim \mu_0} \left[ \frac{1}{\sqrt{2\pi}\sigma_t} \frac{x-a}{\sigma_t^2} \sum_{i=0}^{\infty} \frac{(-1)^i}{i!} \left( \frac{\|x-a\|^2}{2\sigma_t^2} \right)^i \right]}{\mathbb{E}_{a \sim \mu_0} \left[ \frac{1}{\sqrt{2\pi}\sigma_t} \sum_{i=0}^{\infty} \frac{(-1)^i}{i!} \left( \frac{\|x-a\|^2}{2\sigma_t^2} \right)^i \right]} = \frac{\mathbb{E}_{a \sim \mu_0} \left[ \frac{x-a}{\sigma_t^2} \sum_{i=0}^{\infty} \frac{(-1)^i}{i!} \left( \frac{\|x-a\|^2}{2\sigma_t^2} \right)^i \right]}{\mathbb{E}_{a \sim \mu_0} \left[ \sum_{i=0}^{\infty} \frac{(-1)^i}{i!} \left( \frac{\|x-a\|^2}{2\sigma_t^2} \right)^i \right]} \quad (26)$$

666 We will use the following property of analytic functions: if  $f$  and  $g$  are analytic functions over  $\mathbb{R}^d$   
 667 and  $g(x) \neq 0$  for all  $x$  then  $f/g$  is analytic over  $\mathbb{R}^d$ . Since the denominator at the right hand side of  
 668 Eq. (26) is nonzero, it suffices to prove that the numerator and the denominator are analytic. We will  
 669 prove for the denominator and the proof for the numerator is nearly identical. By assumption of this  
 670 lemma, the support of  $\mu_0$  is bounded, hence there is some  $M > 0$  such that  $\|x\| \leq M$  for any  $x$  in  
 671 the support. Then,

$$\left| \frac{(-1)^i}{i!} \left( \frac{\|x-a\|^2}{2\sigma_t^2} \right)^i \right| \leq \frac{1}{i!} \left( \frac{x^2 + a^2}{\sigma_t^2} \right)^i = \frac{M^{2i}}{\sigma_t^{2i} i!}.$$

672 This bound is independent on  $a$ , and summing these absolute values of coefficients for  $i \in \mathbb{N}$ ,  
 673 one obtains a convergent series. Hence we can replace the summation and the expectation in the  
 674 denominator at the right hand side of Eq. (26) to get that it equals

$$\sum_{i=0}^{\infty} \frac{(-1)^i}{i!} \mathbb{E}_{a \sim \mu_0} \left[ \left( \frac{\|x-a\|^2}{2\sigma_t^2} \right)^i \right]. \quad (27)$$

675 This is the Taylor series around 0 of the above-described denominator it converges to the value of the  
 676 denominator at any  $x$ . While this Taylor series is taken around 0, we note the Taylor series around  
 677 any other point  $x_0 \in \mathbb{R}^n$  converges as well. This can be shown by shifting the coordinate system  
 678 by a constant vector such that  $x_0$  shifts to 0 and applying the same proof. One deduces that the  
 679 Taylor series for the denominator around any point  $x_0$  converges on all  $\mathbb{R}^d$ , which implies that the  
 680 denominator in the right hand side of Eq. (26) is analytic. The numerator is analytic as well by the  
 681 same argument. Therefore the ratio, which equals  $s(x, t)$ , is analytic as well as required.

## 682 A.8 Proof of Lemma A.11

683 Let  $t > 0$ , denote by  $\mu_t$  and  $\mu'_t$  the distributions of  $x_t$  and  $x'_t$ , respectively, and by  $p(x, t)$  and  $p'(x, t)$   
 684 the densities of these variables. Then,  $\mu_t = \mu_0 + N(0, \sigma_t^2 I)$ , namely,  $\mu_t$  is obtained by adding an  
 685 independent sample from  $\mu_0$  with an independent  $N(0, \sigma_t^2 I)$  variables, and similarly for  $\mu'_t$ . Hence,  
 686 the density  $p(x, t)$  is the convolution of the densities  $p(x, 0)$  with the density of a Gaussian  $N(0, \sigma_t^2 I)$ .

687 Denote by  $\hat{p}(y, t)$  the Fourier transform of the density  $p(x, t)$  with respect to  $x$  (while keeping  $t$  fixed)  
 688 and similarly define  $\hat{p}'$  as the Fourier transform of  $p'$ . Denote by  $g$  and by  $\hat{g}$  the density of  $N(0, \sigma_t^2 I)$   
 689 and its Fourier transform, respectively. Denote the convolution of two functions by the operator  $*$ .  
 690 Then,

$$p(x, t) = p(x, 0) * g(x), \quad p'(x, t) = p'(x, 0) * g(x).$$

691 Since the Fourier transform turns convolutions into multiplications, one obtains that

$$\hat{p}(y, t) = \hat{p}(y, 0)\hat{g}(y), \quad \hat{p}'(y, t) = \hat{p}'(y, 0)\hat{g}(y).$$

692 Since  $p(x, t) = p'(x, t)$  we obtain that  $\hat{p}(y, t) = \hat{p}'(y, t)$ . Consequently,

$$\hat{p}(y, 0)\hat{g}(y) = \hat{p}'(y, 0)\hat{g}(y)$$

693 Since the Fourier transform of a Gaussian is nonzero, we can divide by  $\hat{g}(y)$  to get that

$$\hat{p}(y, 0) = \hat{p}'(y, 0).$$

694 This implies that the Fourier transform of  $p(x, 0)$  equals that of  $p'(x, 0)$  hence  $p(x, 0) = p'(x, 0)$  for  
 695 all  $x$ , as required.

## 696 B Other proofs

### 697 B.1 Differentiating the loss function

698 Denote our parameter space as  $\Theta \subseteq \mathbb{R}^m$ . In order to differentiate  $L_{t, t', x}^1(\theta)$  with respect to  $\theta \in \Theta$ ,  
 699 we make the following calculations below, and we notice that  $\mathbb{E}_\theta$  is used to denote an expectation  
 700 with respect to the distribution of  $x_{[t', t]}$  according to Eq. (7) with  $s = s_\theta$  and the initial condition  
 701  $x_t = x$ . In other words, the expectation is over  $x_{[t', t]}$  that is taken with respect to the sampler that  
 702 is parameterized by  $\theta$  with the initial condition  $x_t = x$ . We denote by  $p_\theta(x_{[t', t]} \mid x_t = x)$  the  
 703 corresponding density of  $x_{[t', t]}$ . For any function  $f = (f_1, \dots, f_n): \Theta \rightarrow \mathbb{R}^n$ , denote by  $\nabla_\theta f$  the  
 704 Jacobian matrix of  $f$ , where

$$(\nabla_\theta f)_{i,j} = \frac{\partial f_i}{\partial \theta_j}.$$

705 For notational consistency, if  $f$  is a single-valued function, namely, if  $n = 1$ , then  $\nabla_\theta f$  is a column  
 706 vector. We begin with the following:

$$\begin{aligned} \nabla_\theta \mathbb{E}_\theta [h_\theta(x_{t'}, t')] &= \nabla_\theta \int_{\mathbb{R}^d} h_\theta(x_{t'}, t') p_\theta(x_{[t', t]} \mid x_t = x) dx_{t'} \\ &= \int_{\mathbb{R}^d} \nabla_\theta h_\theta(x_{t'}, t') p_\theta(x_{[t', t]} \mid x_t = x) dx_{t'} + \int_{\mathbb{R}^d} h_\theta(x_{t'}, t') \nabla_\theta p_\theta(x_{[t', t]} \mid x_t = x) dx_{t'} \\ &= \mathbb{E}_\theta [\nabla_\theta h_\theta(x_{t'}, t')] + \mathbb{E}_\theta \left[ h_\theta(x_{t'}, t') \frac{\nabla_\theta p_\theta(x_{[t', t]} \mid x_t = x)}{p_\theta(x_{[t', t]} \mid x_t = x)} \right] \\ &= \mathbb{E}_\theta [\nabla_\theta h_\theta(x_{t'}, t')] + \mathbb{E}_\theta [h_\theta(x_{t'}, t') \nabla_\theta \log(p_\theta(x_{[t', t]} \mid x_t = x))] \end{aligned}$$

707 Differentiating the whole loss, we get the following:

$$\begin{aligned} \nabla_\theta L_{t, t', x}^1(\theta) &= \frac{1}{2} \nabla_\theta (\mathbb{E}_\theta [h_\theta(x_{t'}, t')] - h_\theta(x, t))^2 \\ &= (\mathbb{E}_\theta [h_\theta(x_{t'}, t')] - h_\theta(x, t))^\top (\nabla_\theta \mathbb{E}_\theta [h_\theta(x_{t'}, t')] - \nabla_\theta h_\theta(x, t)) \\ &= \mathbb{E}_\theta [h_\theta(x_{t'}, t') - h_\theta(x, t)]^\top \mathbb{E}_\theta [\nabla_\theta h_\theta(x_{t'}, t') - \nabla_\theta h_\theta(x, t)] \\ &\quad + \mathbb{E}_\theta [h_\theta(x_{t'}, t') - h_\theta(x, t)]^\top \mathbb{E}_\theta [h_\theta(x_{t'}, t') \nabla_\theta \log(p_\theta(x_{[t', t]} \mid x_t = x))] \end{aligned}$$

708 Let us compute the gradient of the log density. We use the discrete process, and let us assume that  
 709  $t = t_0 > t_1 > \dots > t_k = t'$  are the sampling times. Then,

$$p_\theta(x_{[t', t]} \mid x_t = x) = \prod_{i=1}^k p_\theta(x_{t_i} \mid x_{t_{i-1}}).$$

710 We assume that

$$p_\theta(x_{t_i} \mid t_{i-1}) = \mathcal{N}(\mu_{\theta,i}, g_i I_d).$$

711 Then,

$$p_\theta(x_{[t',t]} \mid x_t = x) \propto \prod_{i=1}^k \exp\left(-\frac{\|\mu_{\theta,i} - (x_{t_i} - x_{t_{i-1}})\|^2}{2g_i^2}\right)$$

712 Therefore

$$\log p_\theta(x_{[t',t]} \mid x_t = x) = C + \sum_{i=1}^k \frac{\|\mu_{\theta,i} - (x_{t_i} - x_{t_{i-1}})\|^2}{2g_i^2}$$

713 where  $C$  corresponds to the normalizing factor that is independent of  $\theta$ . Differentiating, we get that

$$\nabla_\theta \log p_\theta(x_{[t',t]} \mid x_t = x) = \sum_{i=1}^k \frac{(\mu_{\theta,i} - (x_{t_i} - x_{t_{i-1}}))^\top \nabla_\theta \mu_{\theta,i}}{g_i^2}$$

## 714 B.2 Proof of Lemma 3.1

715 In what appears below, the expectation  $\mathbb{E}[\cdot \mid x_t = x]$  is taken with respect to the distribution obtained  
 716 by Eq. (7), namely, the backward SDE that corresponds to the function  $s$ , with the initial condition  
 717  $x_t = x$ . Similarly,  $\mathbb{E}[\cdot \mid x_{t'}]$  is taken with the initial condition at  $x_{t'}$ . To prove the first direction  
 718 in the equivalence, assume that Property 1 holds and our goal is to prove the two consequences as  
 719 described in the lemma. To prove the first consequence, by the law of total expectation and by the  
 720 fact that  $x_t - x_{t'} - x_0$  is a Markov chain, namely,  $x_0$  and  $x_t$  are independent conditioned on  $x_{t'}$ , we  
 721 obtain that

$$h(x, t) = \mathbb{E}[x_0 \mid x_t = x] = \mathbb{E}[\mathbb{E}[x_0 \mid x_{t'}] \mid x_t = x] = \mathbb{E}[h(x_{t'}, t') \mid x_t = x].$$

722 To prove the second consequence, by Property 1

$$h(x, 0) = \mathbb{E}[x_0 \mid x_0 = x] = x_0.$$

723 This concludes the first direction in the equivalence.

724 To prove the second direction, assume that  $h(x, t) = \mathbb{E}[h(x_{t'}, t') \mid x_t = x]$  and that  $h(x, 0) = x$  and  
 725 notice that by substituting  $t' = 0$  we derive the following:

$$h(x, t) = \mathbb{E}[h(x_0, 0) \mid x_t = x] = \mathbb{E}[x_0 \mid x_t = x],$$

726 as required.

## 727 C Additional Results

### 728 C.1 Property Testing

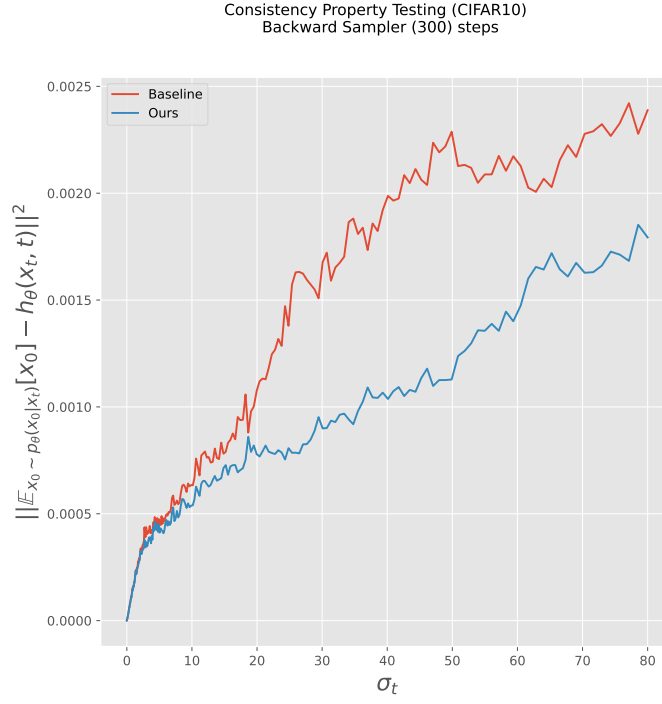

Figure 4: Martingale Property Testing on CIFAR10. The plot illustrates how the Martingale Loss,  $L_{t,t',x_t}^2$ , behaves for  $t' = 0$ , as  $t$  changes.

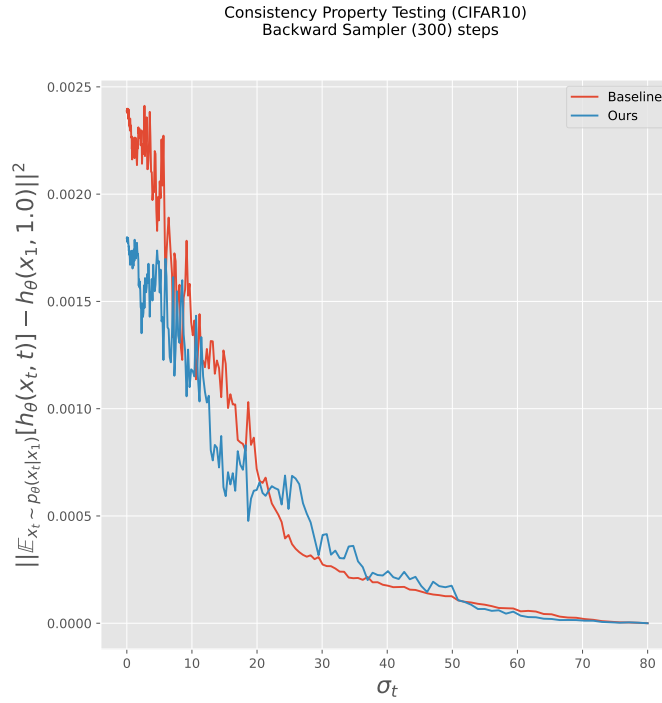

Figure 5: Martingale Property Testing on CIFAR10. The plot illustrates how the Martingale Loss,  $L_{t,t',x_t}^2$ , behaves for  $t = 0$ , as  $t'$  changes.

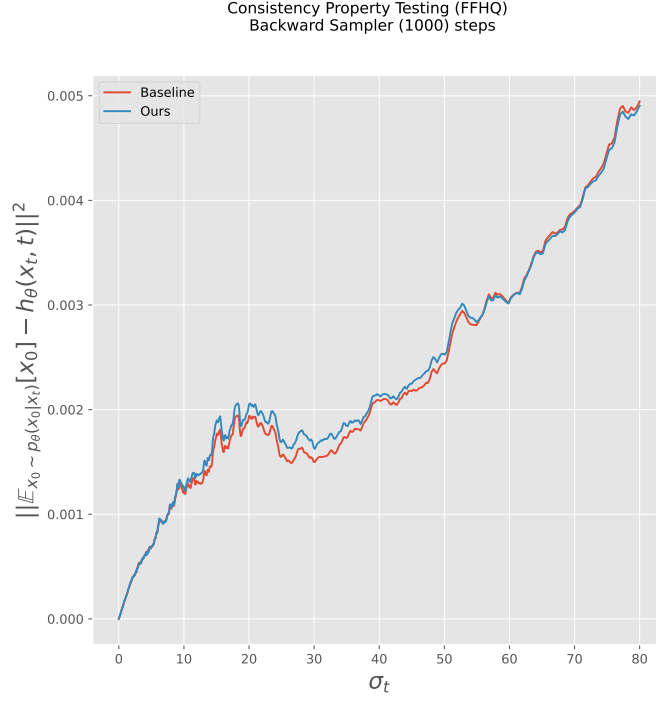

Figure 6: Martingale Property Testing on FFHQ. The plot illustrates how the Martingale Loss,  $L_{t,t',x_t}^2$ , behaves for  $t' = 0$ , as  $t$  changes.

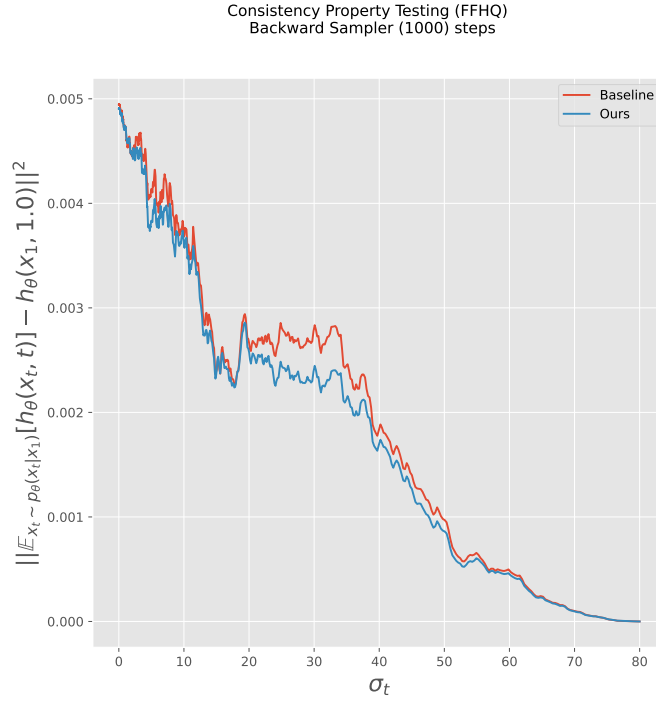

Figure 7: Martingale Property Testing on FFHQ. The plot illustrates how the Martingale Loss,  $L_{t,t',x_t}^2$ , behaves for  $t = 0$ , as  $t'$  changes.



729 **C.2 Uncurated Samples**

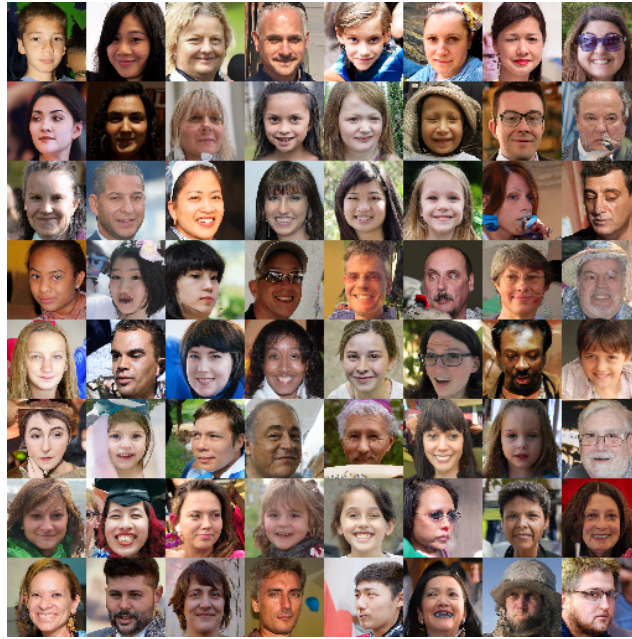

Figure 8: Uncurated generated images by our fine-tuned model on FFHQ. FID: 2.61, NFEs: 79.

730 **D Limitations**

731 The capacity for generative models to exert consequential societal influence in myriad ways is  
732 undeniable, and it also brings along a multiplicity of inherent risks [35, 24, 25, 26]. These models, for  
733 instance, may be exploited to fabricate counterfeit images, and furthermore, they have the potential to  
734 intensify societal prejudices. This work does not seem to exert a direct influence on these particular  
735 biases. It is imperative to acknowledge that addressing such biases presents a substantial challenge.

736 **E We are working on open-sourcing the code for this project. We provide an**  
737 **anonymized version of the code in the supplementary material.**
